1 **Ketones facilitate transcriptional resolution of secondary DNA structures in**  
2 **premature aging**

3

4 Michael Angelo Petr<sup>1,2,3</sup>, Lina M Carmona-Marin<sup>1</sup>, Tulika Tulika<sup>4</sup>, Stella  
5 Kristensen<sup>1</sup>, Simon Reves<sup>1</sup>, Daniela Bakula<sup>1</sup>, Guido Keijzers<sup>1</sup>, Brenna Osborne<sup>1</sup>,  
6 Sarah J Mitchell<sup>5</sup>, Sam Hamilton<sup>2</sup>, Jonathan Kato<sup>2</sup>, Irene Alfaras<sup>6</sup>, Amanuel A.  
7 Teklu<sup>1,7</sup>, Indra Heckenbach<sup>1,3,8</sup>, Jakob Madsen<sup>1</sup>, Michael Ben Ezra<sup>1</sup>, Garik  
8 Mkrtchyan<sup>1</sup>, Erika Varner<sup>9</sup>, Benjamin Fink<sup>9</sup>, Eliana von Krusenstiern<sup>9</sup>, Nathaniel  
9 W Snyder<sup>9</sup>, Hector Herranz<sup>10</sup>, Rafael de Cabo<sup>2</sup>, Morten Scheibye-Knudsen<sup>1,3\*</sup>

10

11 <sup>1</sup>Center for Healthy Aging, Department of Cellular and Molecular Medicine,  
12 University of Copenhagen, Copenhagen, Denmark

13 <sup>2</sup>Translational Gerontology Branch, National Institute on Aging, NIH, Baltimore,  
14 MD 21224, USA

15 <sup>3</sup>Tracked.bio, Copenhagen, Denmark

16 <sup>4</sup>Department of Biotechnology and Biomedicine, Technical University of  
17 Denmark, Lyngby, Denmark

18 <sup>5</sup>Department of Health Sciences and Technology, ETH Zurich, Zurich,  
19 Switzerland

20 <sup>6</sup>Aging Institute, University of Pittsburgh/UPMC, Pittsburgh, PA 15219 USA

21 <sup>7</sup>Department of Biochemistry and Molecular Biology, College of Health Sciences,  
22 Mekelle University, Ethiopia

23 <sup>8</sup>Buck Institute for Research on Aging, Novato, CA 94945, USA

24 <sup>9</sup>Center for Metabolic Disease Research, Department of Cardiovascular  
25 Sciences, Lewis Katz School of Medicine, Temple University, Philadelphia, PA  
26 19140

27 <sup>10</sup>Department of Cellular and Molecular Medicine, University of Copenhagen,  
28 Copenhagen, Denmark

29

30 \*Correspondence: [mscheibye@sund.ku.dk](mailto:mscheibye@sund.ku.dk)

31

32

33

34 **SUMMARY**

35

36 There is currently no established intervention for Cockayne syndrome, a disease  
37 characterized by progressive early onset neurodegeneration with features of  
38 premature aging. Here, we tested if acetyl-CoA precursors, citrate and beta-  
39 hydroxybutyrate, could reduce features of Cockayne syndrome in three model  
40 systems. We identified the gene Helicase 89B as a homologue of CSB in  
41 drosophila and found that the ketone beta-hydroxybutyrate rescued features of  
42 premature aging in Hel89B deficient flies. In mammals, loss of the citrate carrier  
43 Indy exacerbated the phenotype of *Csb<sup>m/m</sup>* mice which was rescued by a  
44 ketogenic diet. The rescue effect appeared to be mediated through ketone  
45 stimulated histone acetylation and facilitation of transcriptional readthrough of  
46 secondary DNA structures. These findings link a ketogenic diet with  
47 transcriptional resolution of secondary structures and DNA repair.

48

49 **Keywords: Aging, Cockayne syndrome, Ketogenic diet, Secondary DNA**  
50 **structures, G-quadruplex**

51

52

## 53 Introduction

54

55 Cockayne syndrome (CS) is a rare genetic disease characterized by neurological  
56 dysfunction, photosensitivity and premature aging<sup>1,2,3</sup>. The disease is most  
57 commonly caused by mutations in the CSB (ERCC6) or CSA (ERCC8) genes,  
58 two genes involved in transcription and transcription coupled nucleotide excision  
59 DNA repair. Previously, it has been shown that acetyl-CoA levels are decreased  
60 in models of Cockayne syndrome likely through persistent activation of a poly-  
61 ADP-ribose polymerase 1 (PARP1) mediated DNA damage response, loss of  
62 Nicotinamide adenine dinucleotide (NAD) and shunting of pyruvate to lactate<sup>4</sup>.  
63 This could likely contribute to a decrease in acetyl-CoA dependent phenotypes  
64 such as demyelination and neurological dysfunction. Citrate and ketones  
65 intimately regulate the amounts of acetyl-CoA. Notably, a ketogenic diet (KD) is  
66 neuroprotective in mice and increases the lifespan in nematodes<sup>4</sup> and mice<sup>5,6</sup>.  
67 Interestingly, acetyl-CoA regulates the amount of histone acetylation and histone  
68 deacetylation<sup>7,8,9,10</sup> which are mediated via histone acetyltransferases (HATs)  
69 and histone deacetylases (HDACs), respectively. Acetyl-CoA acts as the acyl-  
70 donor molecule for these acetylation reactions and metabolism could thereby  
71 directly impacts the chromatin landscape<sup>11</sup>. To that end, there is an overall  
72 depletion of the necessary metabolites and CoA pools with age, affecting  
73 histones and transcription<sup>12</sup>. Without proper histone acetylation, especially in the  
74 context of premature aging this may lead to detrimental chromatin remodeling<sup>13</sup>.

75

76 Indy, a citrate transporter, was originally discovered in drosophila and  
77 heterozygote mutations in Indy significantly extended lifespan of *D. melanogaster*  
78 and *C. elegans*<sup>14,15</sup>. In mice, the mIndy<sup>-/-</sup> (Slc13a5) mouse has decreased  
79 adiposity and increased insulin resistance, features also reported in Csb<sup>m/m</sup> mice  
80<sup>16</sup>. Interestingly, patients with SLC13A5 mutations suffer from early onset  
81 epilepsy, neurodegeneration and developmental delay<sup>17,18</sup> overlapping with  
82 features seen in Cockayne syndrome<sup>1,19</sup>. We hypothesized that loss of Indy  
83 would exacerbate Cockayne syndrome phenotypes and that we could rescue this  
84 exacerbation by adding ketones to titrate acetyl-CoA back. To test this, we  
85 investigate how citrate and ketone metabolism might impact Cockayne syndrome  
86 and aging phenotypes in drosophila, mice and human cell lines. Indeed, we  
87 discovered the existence of transcription coupled repair of DNA in drosophila via  
88 the CSB homologue Hel89B and found that ketones can modulate DNA repair  
89 and extend lifespan in drosophila. To test this in mammals, we generated a novel  
90 Csb<sup>m/m</sup>/mIndy<sup>-/-</sup> double knockout (DKO) mouse and observed a similar outcome.  
91 Mechanistically, ketones appear to facilitate the resolution of transcription

92 through secondary structures by increasing H3K27 acetylation. In short, we have  
93 discovered a possible mechanism for the neuroprotective effect of ketones.  
94

## 95 **Results**

96

### 97 **Hel89B is a drosophila CSB homologue**

98 To understand if a ketogenic diet could impact the lifespan of CSB deficient  
99 animals we turned to *Drosophila melanogaster*, a model that has been used  
100 extensively for aging studies and where INDY is known to influence lifespan<sup>14</sup>.  
101 We performed hierarchical clustering of SWI/SNF like proteins in drosophila with  
102 human CSB and found the closest homologue of CSB in fruit flies appears to be  
103 Helicase 89, isoform B (Hel89B) (Figure 1A). We next generated Hel89B  
104 knockdown flies using the Gal4 system and observed that Hel89B-Gal4 flies  
105 exhibit a significantly reduced hatch rate compared to their controls (Figure 1B,  
106 Supplementary Figure 1A). A key phenotype of nucleotide excision repair defects  
107 in patients is sensitivity to UV-C irradiation. Indeed, UAS-Hel89B (Hel89B) larvae  
108 (Supplementary Figure 1B) exhibits reduced survival with increasing UV-C  
109 doses, compared to their wild-type counterparts UAS-mGFP (mGFP) (Figure 1C,  
110 D, Supplementary Figure 1C). Strikingly, supplementing larvae with 10mM  
111 ketones significantly improved the survival of both Hel89B and mGFP larvae after  
112 UV damage compared with untreated controls.

113

114 A major hallmark of transcription coupled repair deficiency is a delayed  
115 resumption of RNA synthesis after UV-C irradiation. We therefore tested whether  
116 resumption of RNA synthesis was delayed upon knocking down Hel89B in  
117 *Drosophila* S2 cells (Supplementary Figure 1D). Indeed, these cells displayed  
118 decreased EU fluorescence within the cell nuclei, indicating reduced RNA  
119 synthesis with increasing time after exposure to UV light (Figure 1E). Quite  
120 strikingly, ketones facilitated faster resumption of RNA synthesis post UV  
121 exposure (Figure 1E,F,G). In sum, these results indicate that nucleotide excision  
122 repair exists in flies, that Hel89B may be a functional CSB homologue and that  
123 ketones somehow attenuate transcription coupled repair defects.

124

### 125 **Hel89B knockdown leads to impaired motor function in drosophila**

126 A known phenotype in Cockayne syndrome is worsening of gait and motor  
127 function. We therefore wanted to assess this phenomenon in our Hel89B flies.  
128 We first turned to the negative geotaxis assay, with inspiration from the RING  
129 assay in flies<sup>20</sup>, utilizing custom build hardware and software to track and  
130 quantify the behavior of the flies. The crawling profile (coined, flower plot) of the  
131 flies to reach the top after being displaced to the bottom of the vial was limited in  
132 complexity in the Hel89B flies compared to their mGFP controls (Figure 1H). The  
133 speed of the Hel89B flies was also significantly lower (Figure 1I), and the time it  
134 took for the Hel89B flies to vertically crawl 5cm in the vial was longer (Figure 1J).

135

136 To determine our treatment regimen for flies, we wanted to assess which dosage  
137 of ketones was optimal. We tested three doses of the ketone beta-hydroxy  
138 butyrate (BHB): 10mM, 50mM, and 100mM throughout the lifespan of Hel89B  
139 and control flies (Figure 1K). 10mM ketones appear to have a mild lifespan  
140 increase towards the end of life in both genotypes, while 50mM and 100mM BHB  
141 appear to be detrimental. Furthermore, by tracking the motor function of flies over  
142 time, we found that fly movement is reduced with age and that 10mM BHB  
143 treatment conserves motor function in both mGFP (Figure 1L) Hel89B flies  
144 (Figure 1M).

145

146 We next wanted to investigate whether ketones could increase the levels of  
147 acetyl-CoA in our Hel89B flies. We therefore measured acyl-CoAs using mass  
148 spectrometry across the lifespan in the flies. In the Hel89B flies, we observed an  
149 overall decrease in acetyl-CoA throughout their life and this was ameliorated by  
150 ketones (Figure 1N,O and Supplementary Figure 1E). In sum, these results  
151 indicate that Hel89B flies indeed have impaired motor function, that 10mM  
152 ketones is a potentially beneficial dose and that this dose increases acetyl-CoA  
153 levels in Hel89B flies.

154

155

### 156 **Ketones improves the motor function of flies**

157 To understand the interaction between the PARP1-acetyl-CoA axis, INDY, and  
158 Hel89B a large number of experiments were needed. We therefore developed a  
159 high throughput life- and health-span platform using 3D printed parts, computer  
160 vision, and deep neural networks (Figure 2A). Specifically, we trained  
161 convolutional neural networks to identify flies in video feeds of their lab habitat in  
162 real time allowing us precise and high-throughput tracking of flies longitudinally.  
163 This allowed us to monitor the fruit flies continuously for the duration of each  
164 individual fly's life and predict the age and health of the fly at any point. With this  
165 novel methodology, we characterized the lifespan and age-associated behavioral  
166 changes of a battery of genotypes, ketones, citrate and Olaparib (20 genotypes  
167 and 4 treatment groups, 5644 flies) (Supplementary Figure 2). As confirmed  
168 before<sup>21</sup>, heterozygote INDY flies live longer than the homozygote counterparts  
169 and wild-type flies (Figure 2B, Figure 2C) and INDY206/Hel89B1 mutants, who  
170 are relatively short-lived, have increased max and mean lifespans (Figure 2B, C)  
171 compared to Hel89B mutants. We next quantified the motor function including  
172 distance traveled and walking speed for all of our flies using this system. We  
173 found that 10mM BHB improved the lifetime motor function (Figure 2D) and  
174 change in speed with age (Figure 2E) of most genotypes tested including

175 Hel89B1 flies. Interestingly, this was also the case for citrate treatments that  
176 slightly increased mean lifespan in many genotypes. Interestingly, ketones  
177 overall increase the starting distance of flies (Figure 1F), however decrease the  
178 change of speed throughout their lifespan (Figure 1G). longitudinal results show  
179 that overall, ketones improve the lifespan of certain genotypes and appear to  
180 improve the lifetime motor function of flies.

181

182

183

#### 184 **A ketogenic diet rescues premature aging in Csb-mIndy double knockout** 185 **mice**

186 Since there are large variations in how different organisms handle acetyl-CoA,  
187 citrate and ketone metabolism, we next wanted to investigate mice. To  
188 understand if acetyl-CoA precursors could affect the phenotype of Csb<sup>m/m</sup> we  
189 crossed the Csb<sup>m/m</sup> mice with mIndy<sup>-/-</sup> mice to generate Csb<sup>m/m</sup> mIndy<sup>-/-</sup> double  
190 knockout (DKO) mice. We then fed 6-month-old WT, Csb<sup>m/m</sup>, mIndy<sup>-/-</sup> and DKO a  
191 standard (SD) or a ketogenic diet (KD) for 6 months (Supplementary Figure 3A).  
192 Throughout the study the mice were monitored with key metrics including body  
193 weight, food intake, body temperature, body composition and gait function  
194 (Figure 3A-C, Supplementary Figure 2E). As we hypothesized, the DKO mice  
195 exhibited exacerbated phenotypes, and benefited the most from the ketogenic  
196 diet. The DKO mice had lower body weight that was rescued by the ketogenic  
197 diet despite no difference in food intake or temperature (Figure 3A-D). The DKO  
198 mice also displayed an inability to accumulate fat, a characteristic of DNA repair  
199 deficiency, on a standard diet, however this was rescued when fed a ketogenic  
200 diet (Figure 3E-G). This was also confirmed when the mice were dissected and  
201 white adipose tissue and other organs were weighed (Supplementary Figure 3B).  
202 After observing the fat modulation in the DKO mice, we decided to analyze the *in*  
203 *vivo* metabolism of the mice with enclosed metabolic cages. Here, we observed  
204 that DKO mice had an overall higher oxygen consumption rate compared to wild  
205 type mice and this was greatly reduced by a ketogenic diet in the double  
206 knockout mice (Figure 3H). The respiratory exchange ratio (RER) revealed that  
207 Csb<sup>m/m</sup> single knockouts switched to use of fats as an energy substrate (Figure  
208 3I). We next investigated the metabolic output of the mice while they ran on a  
209 metabolic treadmill, to gauge energetic efficiency. Csb<sup>m/m</sup> mice exhibited an  
210 overall lower VO<sub>2</sub> (Figure 3J) and RER (Figure 3K), indicating utilization of fat as  
211 an energy source while active. When administered the ketogenic diet, the Csb<sup>m/m</sup>  
212 mice have a comparable RER to the WT mice, however.

213

214 In the past it has been reported that  $Csb^{m/m}$  mice are able to clear glucose at a  
215 higher rate than WT mice<sup>3</sup>. In our study, we found that the ketogenic diet  
216 improved glucose tolerance in WT and  $mIndy^{-/-}$  mice but not in  $Csb^{m/m}$  or DKO  
217 mice (Figure 3L,M). We observed little effect on insulin tolerance between the  
218 groups (Figure 3N,O). Further, hematoxylin and eosin (H&E) staining was  
219 performed on the postmortem liver, and decreased lipid droplet formation in the  
220 livers of the  $Csb^{m/m}$ ,  $mIndy^{-/-}$  and DKO mice was observed (Figure 3P). In all  
221 genotypes, when administered the ketogenic diet, these mice experienced an  
222 increase of fat droplets in the liver. Notably, luxol fast blue staining of the  
223 cerebellum revealed that  $Csb^{m/m}$  mice displayed a decreased amount of stained  
224 myelin, a feature previously seen in Cockayne syndrome patients<sup>23</sup>, and this was  
225 reversed when given a KD increased (Figure 3P). We also investigated the  
226 hematology of the mice and found increased levels of large unstained cells and  
227 monocytes upon  $Csb$  deficiency perhaps suggesting increased inflammatory  
228 activation (Supplementary Figure 3C). In sum, loss of  $mIndy$  exacerbates the  
229 phenotype of  $Csb^{m/m}$  mice and a ketogenic diet attenuates these changes.

230

### 231 **A ketogenic diet attenuates neurological deficits in double knockout mice**

232 We wanted to further assess the neurological function of the mice, given that CS  
233 patients experience neurological dysfunction, such as hearing loss<sup>24,25,26,19</sup>.  
234 Therefore, we utilized a piezoelectric-based startle chamber (SR Labs) for testing  
235 the hearing in the mice.  $Csb^{m/m}$  and DKO mice have hearing deficits, and  
236 furthermore the ketogenic diet improved the hearing in the DKO mice (Figure 3Q)  
237 by showing an increased sensitivity in the hearing test. Behavior attributes  
238 including open-field and elevated zero maze were used to assess changes in  
239 anxiety behavior and activity (Supplementary Figure 2D,E). Cockayne syndrome  
240 patients are described to be outgoing<sup>25</sup>, and  $Csb^{m/m}$  mice were previously  
241 observed as less anxious from open-field examination<sup>4</sup>. However, we did not  
242 observe the same in our mice in the open-field test. Y-maze spontaneous  
243 alteration test was also carried out to assess the overall cognitive function of the  
244 mice, to determine if working memory was improved by the ketogenic diet,  
245 however we saw no genotype or diet effects (Supplementary Figure 2F). Lastly,  
246 high resolution kinematic analysis was performed on the mice, specifically to  
247 measure gait speed which is a metric translatable to humans and declines with  
248 age<sup>27</sup>. Overall the knockout mice had an increased gait speed, and the ketogenic  
249 diet normalizes this (Supplementary Figure 2G).

250

### 251 **A ketogenic diet reduces transcriptomic changes in $mIndy^{-/-}$ , $Csb^{m/m}$ and** 252 **double knockout mice**



253 To further evaluate global changes in the brain of the mouse models we  
254 performed RNA-seq analysis of the cerebellum, a target organ in Cockayne  
255 syndrome, in the four genotypes with and without a ketogenic diet  
256 (Supplementary Figure 4A). Notably, the KD appeared to reduce the number of  
257 significantly changed gene ontology pathways (Supplementary Figure 4B).  
258 Further,  $Csb^{m/m}$  and DKO mice have an upregulation in inflammatory pathways,  
259 consistent with previous findings<sup>24,23</sup>, and the ketogenic diet suppresses these  
260 pathways (Figure 4A and Supplementary data file). In general, the ketogenic diet  
261 upregulated mitochondrial energy related pathways as well as pathways involved  
262 in ribosome function across genotypes. In both standard and ketogenic diets, the  
263 DKO mice have downregulated stimuli and smell related pathways. The olfactory  
264 down-regulation is observed in the  $Csb^{m/m}$  and  $mIndy^{-/-}$  mice as well (Figure 4A).  
265 Interestingly,  $mIndy^{-/-}$  mice on a ketogenic diet did not have a single significantly  
266 changed downregulated GO term and only a few upregulated suggesting  
267 normalization of the cerebellar transcriptome in this genotype.

268

#### 269 **A ketogenic diet normalizes the metabolome of $Csb^{m/m}$ , $mIndy^{-/-}$ and DKO** 270 **mice**

271 Since we observed global *in vivo* metabolic changes in the four genotypes, we  
272 decided to perform untargeted metabolomics on the cerebellum, a target organ in  
273 Cockayne syndrome. To get a broad overview of changes, we first performed  
274 hierarchical clustering and principal component analysis (Figure 4B and  
275 Supplementary Figure 4C). Strikingly,  $Csb^{m/m}$  and  $mIndy^{-/-}$  mice displayed almost  
276 identical metabolic profiles while the DKO further exacerbated the difference  
277 relative to WT. The ketogenic diet attenuated the genotype component (PC2) of  
278 the metabolic profile of  $mIndy^{-/-}$ ,  $Csb^{m/m}$  and DKO mice (Figure 4B). We further  
279 investigated specific pathways that were altered compared to WT mice fed  
280 standard food. In the enrichment analysis (Supplementary Figure 4), sphingolipid  
281 metabolism was greatly upregulated by the ketogenic diet, of note because  
282 sphingolipid metabolism is essential to myelin synthesis, which counteracts the  
283 demyelination phenotype in CS patients<sup>28</sup>. When considering the pathway  
284 topology impact compared to WT SD, one of the most significant pathways that  
285 appeared were “synthesis and degradation of ketone bodies” in  $Csb^{m/m}$  mice  
286 (Figure 4C), which could indicate that ketones metabolism is dysregulated in the  
287 Cockayne syndrome mice. Considering the pathway impact, nicotinate and  
288 nicotinamide are upregulated when the  $Csb^{m/m}$  mice are administered a KD  
289 (Figure 4D), driving the point that a KD may improve  $NAD^+$  metabolism. Of  
290 considerable interest as well, is the increased impact of aminoacyl-tRNA  
291 biosynthesis in the DKO SD group versus DKO KD (Figure 4G), perhaps caused  
292 by  $Csb$ 's role in transcription guided resolution of secondary structures<sup>29,30</sup>.

293

294 **Csb<sup>m/m</sup> and DKO mice have low acyl-CoAs which are improved by the**  
295 **ketogenic diet**

296 Previously it was found that acetyl-CoA levels are reduced in CSB deficient  
297 cells<sup>4</sup>. We therefore decided to investigate the acetyl-CoA and related  
298 metabolites by mass spectrometry. Indeed, in the standard chow fed mice, we  
299 see a decrease in acetyl-CoA within the quadriceps of the single and double KO  
300 mice, a decrease of acetyl-CoA in the liver of Csb<sup>m/m</sup> and mIndy<sup>-/-</sup> mice, and  
301 increase of acetyl-CoA in the cerebellum of the mIndy<sup>-/-</sup> and Csb<sup>m/m</sup> single KO  
302 mice. The ketogenic diet reversed the effects for each (Figure 4J-L). Further  
303 downstream, malonyl-CoA, formed by carboxylation of acetyl-CoA and a  
304 committed step in fatty acid synthesis, is decreased DKO SD in quadriceps,  
305 decreased for all knockouts in the cerebellum, and decreased for the single  
306 knockouts in the liver (Figure 4J-L). Succinyl-CoA, a citric acid cycle intermediate  
307 that is an entry point for branched-chain amino acids (BCAA's) valine and  
308 isoleucine, and which a depletion of leads to mitochondrial deficiency and muscle  
309 weakness<sup>31,32</sup>, is interestingly depleted in the mIndy<sup>-/-</sup> and Csb<sup>m/m</sup> SD mice,  
310 however not affected in DKO SD mice, while only WT and DKO mice are  
311 upregulated with a ketogenic diet. We also observed that glutaryl-CoA, an  
312 intermediate of lysine and tryptophan metabolism that are substrates in the  
313 synthesis of NAD, is up-regulated generally by the KD in quadriceps (Figure 4L).

314  
315 **Ketones attenuate cellular features of Cockayne syndrome**

316 We next wanted to assess molecularly whether ketones could impact cellular  
317 health outcomes and the mechanism with which this occurs. It's known that CSB  
318 cells are also sensitive to UV damage. We observed that UV sensitive CSB cells  
319 when treated in low glucose conditions have increased UV survival (Figure 5A).  
320 Given, the UV survival improvements, we next wanted to test if cells from  
321 Cockayne syndrome patients displayed increased cellular senescence and if  
322 ketones would affect this premature aging phenotype. First, we investigated  
323 whether there was a higher incidence of senescence in primary dermal  
324 fibroblasts from a Cockayne syndrome patient or healthy control (Supplementary  
325 Figure 6A). Using a deep neural network able to predict senescence based on  
326 DAPI staining<sup>33</sup> we observed that Cockayne syndrome fibroblasts are indeed  
327 predicted to be more senescent with increasing passage number than healthy  
328 control cells. Interestingly, 10mM BHB decrease senescence of control cells at  
329 low and medium passages and CS cells at the low passage (Figure 5B).

330  
331 **Decreased histone acetylation in CS is recovered with ketone**  
332 **administration**

333 In addition to being a substrate for mitochondrial energy metabolism, ketones  
334 also directly impact the epigenetic landscape through inhibition of histone  
335 deacetylases and as acetyl-CoA donors for acetylation reactions<sup>34,35</sup>. Further, it  
336 has been shown previously that RNA Pol I transcription is stimulated by acetyl-  
337 CoA<sup>36</sup>, a process that is deficient in Cockayne syndrome. We therefore  
338 investigated the acetylation patterns upon loss of CSB. To do this we generated  
339 CSB knockout cells using CRISPR-Cas9 targeting of exon 2 in the neurologically  
340 relevant SH-SY5Y cell lines. As expected, the knockout cells were more sensitive  
341 to UV-C radiation (Supplementary Figure 6B). We therefore investigated how  
342 DNA damage might impact histone acetylation 0, 3, 6, 12 and 24 hours after  
343 irradiation. Using this approach we observed that ac-H3K27, a marker known to  
344 regulate RNA pol I mediated transcription<sup>37</sup>, was depleted in CSB deficient cells  
345 (Figure 5C). Previous work has shown that the DNA damage response recruits  
346 histone acetyl transferases to the damage site<sup>38,39</sup>. Notably, this histone acetyl  
347 transferase P300/CBP-associated factor (PCAF) has previously been shown to  
348 be essential for NER<sup>38</sup> and involved in the metabolic adaptation of CSB deficient  
349 cells<sup>4</sup>. We therefore wanted to further investigate whether decreased acetylation  
350 was linked to the DNA damage responses. Interestingly, treatment with the  
351 PARP inhibitor Olaparib decreased the levels of H3K27ac and PCAF recruitment  
352 to histones (Figure 5D). In summary, ketones attenuated UV induced cell death  
353 and induced acetylation in CSB deficient cells.

354

### 355 **Ketones alleviate rRNA transcription through secondary structures**

356 Given that secondary structures more frequently occur in ribosomal DNA and  
357 these can activate the DNA damage response<sup>29</sup>, we investigated the role of  
358 ketones with regards to rRNA transcription. We observed that BHB increases  
359 47S rRNA transcription significantly in dermal fibroblasts (Figure 5E), from  
360 healthy controls and CSB patients. We were curious if the impact of stabilizing  
361 G4 structures would show an additive affect with RNA Pol I inhibition. Therefore,  
362 we treated WT and CRISPR KO of CSB HeLa cells in low glucose media with the  
363 G4 stabilizer pyridostatin, in combination with the RNA Pol I inhibitor CX5461 and  
364 investigated cellular survival. Interestingly, we found non-additive effects  
365 between the treatments suggesting that both drugs elicit their toxic effect through  
366 the same mechanism (Figure 5F). We next questioned whether CSB deficient  
367 patient derived cells (CS1AN) were able to compensate under stress with  
368 chromatin decondensation, which could allow repair to take place. We observed  
369 that chromatin in CS cells were not able to decondense after UV damage (Figure  
370 5G). Taken together, these results indicate that G4 stalling and RNA Pol I  
371 inhibition are epistatic and that chromatin condensation is increased in CSB  
372 deficient cells perhaps consistent with a general decrease in histone acetylation.

373

## 374 **Ketones relieve transcriptional stalling at G4 structures**

375 Previously it was shown that stalling of transcription occurs at various types of  
376 secondary DNA structures particularly in CSB deficient cells, with the strongest  
377 stalling occurring where G-quadruplex structures are present<sup>29</sup>. Strikingly, by  
378 analyzing our RNA seq data we discovered stalling of transcription at G-  
379 quadruplexes in *mIndy*<sup>-/-</sup> (Figure 5H) and *Csb*<sup>m/m</sup> (Figure 5I) and was particularly  
380 prominent in DKO and this stalling was normalized by a ketogenic diet (Figure 5J,  
381 Supplementary Figure 7). To further explore these effects on transcription we  
382 datamined several studies. First, we explored if inhibiting various stages of  
383 nucleotide excision repair by knocking down ERCC6, XPC, XPA, ERCC4, and  
384 ERCC5 would impact stalling at G4 structures (GSE168861). Notably, we  
385 observed each of the knockdown cell lines experience increased stalling around  
386 the G4 sites with the strongest stalling occurring after CSB knockdown (Figure  
387 5K). Since transcription is heavily affected by histone acetylation, we speculated  
388 that ketones might impact stalling at these structures. Indeed, in a published  
389 H3K27 acetylation ChIP-seq data (GSE134044) we found that H3K27 acetylation  
390 is lost at G4 structures and that fasting, an intervention leading to ketosis,  
391 normalized H3K27 acetylation at predicted G4 structures. (Figure 5L). Further, in  
392 a published ChIP-seq dataset (GSE93975) we found PCAF enrichment at G4  
393 structures (Figure 5M). And, by inhibiting transcriptional elongation with JQ1, a  
394 BET bromodomain inhibitor, (GSE56267) leads to increase stalling at G4s  
395 (Figure 5N). To understand if this has clinical relevance, we identified diseases  
396 with defects in acetylation, myelination and mitochondrial function and clustered  
397 their clinical phenotype as previously described<sup>29,40</sup>. Interestingly, we found close  
398 phenotypical overlap with Cockayne syndrome and Early infantile  
399 encephalopathy and epilepsy 25 (EIEE25) caused by mutations in *INDY* in all  
400 these diseases (Figure 5O). These data indicate that ketones may increase  
401 histone acetylation leading to transcriptional readthrough of secondary DNA  
402 structures and a reduction in PARP activation (Supplementary Figure 8).

403

404

## 405 **Discussion**

406

407 Here, we found that manipulating the acetyl-CoA donors impacts age-related  
408 phenotypes in models of Cockayne syndrome. Whether *Drosophila* contained key  
409 NER proteins such as CSB and CSA was debated and doubted in the past<sup>41</sup>.  
410 However, recent evidence suggests that TC-NER does take place in *S2*  
411 *Drosophila* cell lines and a homologue of the XPA binding protein 2 (XAB2) has  
412 recently been found in *Drosophila*<sup>42-44</sup>. With Hel89B as the potential homolog to  
413 ERCC6, this finally provides a mechanistic basis for TC-NER in this species.

414 Interestingly, Hel89B was also shown to have homology to BTAF1<sup>45</sup>, which can  
415 act as a transcriptional repressor as well. Nevertheless, Hel89B deficiency  
416 appear to recapitulate two key hallmarks of TC-NER deficiency: UV-sensitivity  
417 and decreased resumption of RNA synthesis after UV-C irradiation. Furthermore,  
418 flies with less Hel89B live significantly shorter than their wild-type counterparts.  
419 These are all classical Cockayne syndrome phenotypes and provide evidence for  
420 a potentially novel ERCC6 homologue and the usability of Hel89B deficient flies  
421 as a new Cockayne syndrome model.

422  
423 In mammals, loss of mIndy in Csb mice exacerbates the phenotype at the  
424 behavioral, metabolic and transcriptomic level and ketones rescue these  
425 phenotypes. Interestingly, it was recently reported that DNA damage increases  $\beta$ -  
426 oxidation as a means of producing acetyl-CoA<sup>11</sup>. This would be consistent with  
427 our findings here and previously<sup>4</sup> where loss of Csb leads to increased fatty acid  
428 oxidation. We hypothesize, that the switch to fatty acid oxidation is an adaptive  
429 response to allow increased acetylation to take place in response to DNA  
430 damage perhaps to facilitate histone relaxation and increased DNA accessibility.

431  
432 The core molecular mechanism with which ketones confer neuroprotection and  
433 longevity has not yet been resolved. In Cockayne syndrome models, it was  
434 suggested that the effectiveness of ketones could be mediated through activation  
435 of SIRT1<sup>4</sup>. Ketones are also shown to increase histone acetylation and act as an  
436 HDAC inhibitor<sup>35</sup>. We further validated these findings with ketones increasing  
437 overall histone acetylation levels in both our cell and mouse models of Cockayne  
438 syndrome. At the molecular level, it appears that ketones are able to facilitate  
439 transcription through G4 structures by increasing histone acetylation. This is  
440 particularly prominent at rRNA where H3K27 acetylation and acetyl-CoA levels  
441 are known to positively regulate transcription. Thus, ketones likely facilitate  
442 histone acetylation thereby allowing chromatin decondensation and access for  
443 transcription associated helicases that can unwind G4 structure. Notably, loss of  
444 transcription associated helicases XPD and XPB, two helicases known to bind  
445 G4 structures, can also cause Cockayne syndrome<sup>46</sup>. At a more general level,  
446 our data provide evidence that ketones could be neuroprotective by allowing  
447 resolution of secondary DNA structures.

448

## 449 **Materials and Methods**

450

### 451 **Animals and diets**

452 Six-month-old-mice were fed a standard AIN-93G diet ad libitum or a ketogenic  
453 diet (Dyets) with 60% calories coming from fat, primarily hydrogenated coconut  
454 oil. WT, mIndy<sup>-/-</sup>, Csb<sup>m/m</sup>, and mIndy<sup>-/-</sup> Csb<sup>m/m</sup> were of C57BL6 background and  
455 generated by first mating single knockouts to generate double heterozygotes.  
456 Double heterozygotes were then mated to generated all genotypes that occurred  
457 at roughly mendelian frequencies. Unless otherwise stated measurements took  
458 place at 6 months, 9 months and 12 months of age. Body weight, chipped body  
459 temperature via electronical tagging (Biomedic Data System, Maywood, NJ), and  
460 food consumption were recorded every two weeks of the study after the diet was  
461 administered. Animal rooms were maintained at 20-22°C and a 12-hour light/dark  
462 cycle. All animal protocols were approved by the Animal Care and Use  
463 Committee (277-TGB-2019) of the National Institute on Aging (Baltimore, MD,  
464 USA).

465

### 466 **Metabolic assessment**

467 The metabolic rate of the mice was assessed by indirect calorimetry in open-  
468 circuit oxymax chambers using the Comprehensive Lab Animal Monitoring  
469 System (CLAMS; Columbus Instruments, Columbus). Mice were singly housed  
470 with water and food available ad libitum and maintained at 24°C under a 12:12 h  
471 light-dark cycle (light period 0600-1800).

472

### 473 **Body Composition**

474 Measurements of lean, fat and fluid mass in live mice were acquired by nuclear  
475 magnetic resonance (NMR) using the Minispec LF90 (Bruker Optics, Billerica,  
476 MA).

477

### 478 **Gait analysis**

479 Gait analysis was performed previously as described<sup>27</sup> (PMID 30649206). In  
480 brief, mice were acclimated a week before in the TSE MotoRater, in order to  
481 assure smooth running across the narrow platform. When ready for the  
482 experiment, mice were recorded running over the path twice, and this data was  
483 averaged for analysis.

484

### 485 **Startle Chamber analysis**

486 The startle response system (SR-Labs, San Diego, California, USA) was used to  
487 assess hearing in the mice. Mice were acclimated before the sound cycle began.

488 The cycle consisted of 20ms pulses of 65, 70, 75, 80, 85, 90, 95, 100, 105, 110,  
489 115, and 120 dB, with an inter-trial interval (ITI) of 100 ms.

490

#### 491 **Oral Glucose Tolerance Test (OGTT) and Insulin Tolerance Test (ITT)**

492 Mice were fasted for 3 hours prior to OGTT and ITT. For OGTT, mice received a  
493 30% glucose solution (1.5g/kg glucose by gavage). For ITT, a dose of 1IU/kg  
494 insulin (Novo Nordisk) was injected intraperitoneally. Blood glucose was  
495 measured at time points 0, 15, 30, 60, and 120 minutes following gavage or  
496 injection.

497

#### 498 **Metabolic treadmills**

499 Mice were acclimated on the metabolic treadmills (Columbus Instruments) at 5  
500 m/min for 30 min the day prior to testing to ensure familiarity. The next day, mice  
501 warmed up on the treadmill with 5 m/min for 2 minutes, and then ran at 12 m/min  
502 for 10 minutes.  $VO_2$  and  $VCO_2$  were simultaneously recorded.

503

#### 504 **Histology**

505 Histology and mounting of the liver and cerebellum was performed by the Core  
506 Facility for Integrated Microscopy (CFIM) with formalin fixation followed by  
507 paraffin embedding and section. The slides were imaged in CFIM as well, using  
508 20x magnification in the automated slide scanner Axio Scan.Z1 (Zeiss). Liver was  
509 stained with H&E and cerebellum was stained with either H&E or luxol fast blue.

510

#### 511 **RNA-sequencing and RNA extraction**

512 RNA isolation was performed using TRIzol (Thermo-Fischer). RNA-seq was  
513 performed on 48 mouse cerebellum samples, by BGI genomics using whole RNA  
514 seq analysis, rRNA depleted. Analysis was performed using an in-house pipeline  
515 described:

516

517 Paired-end reads from 44 RNA-Seq samples were aligned to mm9 using  
518 bowtie2<sup>47</sup>. Differential expression analysis was performed using a Salmon<sup>48</sup> →  
519 tximeta<sup>49</sup> → DESeq2<sup>48</sup>. GSEA was performed directly on DESeq2 normalized  
520 counts. All comparisons were made against WTSD. The Gene Set used was the  
521 C5 collection based Gene Ontology (GO) terms<sup>50,51</sup>. Terms were filtered for FDR  
522 < 0.05 and sorted by Normalized Enrichment Score (NES).

523

524 Paired-end reads from 44 RNA-Seq samples were aligned to mm9 using  
525 bowtie2<sup>47</sup>. We used a list of identified regions from the non-B DB<sup>52</sup> database  
526 predicted to form G-quadruplex candidate structures to delineate a 1000bp  
527 window (500bp before start of motif and 500bp after end of motif, not including

528 motif itself.) We then calculated the allelic depth surrounding G-quadruplex motifs  
529 within the 1000bp window. We specifically selected G-quadruplex motifs for  
530 which the entire 1000bp is contained within gene sequences. Since G-  
531 quadruplex motifs are stranded we distinguish sense transcription from antisense  
532 transcription. We then calculated the reference allelic depth and the reference  
533 allele frequency. Code can be found at [github.com/scheibye-knudsen-](https://github.com/scheibye-knudsen-lab/INDYCSB-mutations)  
534 [lab/INDYCSB-mutations](https://github.com/scheibye-knudsen-lab/INDYCSB-mutations).

535

### 536 **Metabolomics quantification and analysis**

537 Metabolomics measurements were performed on 48 mouse cerebellum samples  
538 by Scripps Center for Metabolomics (La Jolla, California, USA) using untargeted  
539 metabolomics, HILIC negative. The analysis was performed using a combination  
540 of the XCMS platform and MetaboAnalystR 2.0.

541

### 542 **Acyl-CoA extraction and LC-MS of mice tissue**

543 Analysts blinded to experimental groups performed acyl-CoA analysis by stable  
544 isotope dilution liquid chromatography- high resolution mass spectrometry on an  
545 Ultimate 3000 autosampler coupled to a Thermo Q-Exactive Plus as previously  
546 described<sup>53</sup>. In brief, frozen samples and calibration curve points were spiked  
547 with 100  $\mu$ L of [<sup>13</sup>C<sub>3</sub><sup>15</sup>N<sub>1</sub>]-acyl-CoA internal standards generated as previously  
548 described from [<sup>13</sup>C<sub>3</sub><sup>15</sup>N<sub>1</sub>]-pantothenic acid<sup>54</sup>, samples were homogenized by  
549 probe tip sonication, then acyl-CoA extraction was performed by solid phase  
550 extraction<sup>55</sup>.

551

552

### 553 **Drosophila strains**

554 The following *Drosophila* strains are described in the following references: UAS-  
555 mGFP, UAS-mCherry, yellow-white (yw), and Actin-Gal4/CyO were kindly  
556 provided by Hector Herranz's group at ICMM. The following stocks were provided  
557 by the Bloomington *Drosophila* Stock Center: Hel89B #1 (#32895), w<sup>1118</sup>  
558 (#5905), Indy<sup>206</sup> (#27901), and Indy<sup>302</sup> (#27902). The following stocks were  
559 provided by the Vienna *Drosophila* RNAi Center: Hel89B #2 (#4237). The  
560 w;Actin-Gal4/CyO;Indy<sup>206</sup>/Bal and w;Actin-Gal4/CyO;Indy<sup>302</sup>/Bal driver lines were  
561 generated in-house. Flies were maintained on standard SYA food at 25C in a 12  
562 hour light/dark cycle with constant 60% humidity. Ketones used for all  
563 experiments were (R)-3-Hydroxybutyric acid (Sigma-Aldrich #54920). Citrate  
564 used for all experiments was sodium citrate (Sigma-Aldrich #1613859). Olaparib  
565 used for all experiments was Selleckchem #AZD2281.

566

### 567 **UV survival assay**



568 Third instar larvae were exposed to UV-C irradiation (custom built machine) at  
569 log-scale doses: 0J/m<sup>2</sup>, 50J/m<sup>2</sup>, 100J/m<sup>2</sup>, and 200J/m<sup>2</sup>. Afterwards, they were  
570 placed in standard agar food in standard vials, and survival was recorded in  
571 subsequent days. Flies were also video recorded throughout their hatching.

572

### 573 **Lifespan and motor function throughout the life**

574 *Drosophila* crosses laid eggs in 25C and adult experimental flies were allowed to  
575 emerge and mate for 1 day. Afterwards adult flies were lightly anaesthetized with  
576 CO<sub>2</sub> and males selected to assess for experiments. Per vial, a density of 10 flies  
577 were used for lifespan assessment. Fruit flies were recorded every hour of every  
578 day using the platform from Tracked.bio. Each week, manual counts were also  
579 taken of the flies. Flies were fed with sufficient amounts of food for 1 week and  
580 therefore fresh food was exchanged weekly. Food contained low melting agar  
581 (OmniPur® Agarose, Low Melting, CAS 9012-36-6, Merck) during lifespan  
582 assessments only to ensure the quality of compounds was preserved. Lifetime  
583 motor function was calculated as the the area under the curve of the linear  
584 regression of max distance traveled per day; this larger time point used to  
585 calculated AUC was the mean lifespan of the flies.

586

### 587 **Resumption of RNA synthesis**

588 S2 cells were UV'ed with 40J/m<sup>2</sup> of UV-C (custom built machine) and then  
589 incubated in 1 mM EU in the culture media for 3 hours followed by processing  
590 with the Click-IT RNA Alexa Fluor 594 imaging kit (ThermoFisher #C10330).

591

### 592 **RT-PCR of third instar larvae**

593 3<sup>rd</sup> third instar larvae were selected after being grown in *Drosophila* fly cages with  
594 media and yeast paste. The larvae were RNA extracted with a standard TRIzol,  
595 phenol:chloroform protocol. Before extraction, flies were pulverized with 3D  
596 printed spears. cDNA synthesis was performed with the Applied Biosystems™  
597 High-Capacity cDNA Reverse Transcription Kit (#4368814). RT-PCR was  
598 performed with SensiFAST™ master mix. Primer sequences used were:  
599 Hel89B\_forward: CCGCCTTGAAGCAACTTCTC, Hel89B\_reverse:  
600 CCTCGTACTGATGCTCGGAC, rp49\_forward: AAGCGGCGACGCACTCTGTT,  
601 and rp49\_reverse: GCCCAGCATACAGGCCCAAG.

602

### 603 **RT-PCR of S2 cells**

604 S2 cells were cultured in 35mm dishes and treated with the respective RNAi or  
605 scramble RNAi. RNA was then extracted with the Zymo Research RNA MiniPrep  
606 Plus kit (#R2072). cDNA synthesis was performed with the Applied Biosystems™  
607 High-Capacity cDNA Reverse Transcription Kit (#4368814). RT-PCR was

608 performed with SensiFAST™ master mix. Oligo sequences used for knockdown  
609 experiments were: siHel89B1: AAGAUCCUUACUCUAGAUCAA, siHel89B2a:  
610 AAUGAAGGAUCUGCAGGCUA, siHel89B2b: CACCUCACAGAUCUUUGACC.  
611 siHel89B1 showed the greatest knockdown efficiency and was used for further  
612 experimentation.

613

614

### 615 **Acyl-CoA extraction and LC-MS of fruit flies**

616 Female fruit flies were collected at the indicated time points. Analysts blinded to  
617 experimental groups performed acyl-CoA analysis by stable isotope dilution liquid  
618 chromatography- high resolution mass spectrometry on an Ultimate 3000  
619 autosampler coupled to a Thermo Q-Exactive Plus as previously described<sup>53</sup>. In  
620 brief, frozen samples and calibration curve points were spiked with 100 µL of  
621 [<sup>13</sup>C<sub>3</sub><sup>15</sup>N<sub>1</sub>]-acyl-CoA internal standards generated as previously described from  
622 [<sup>13</sup>C<sub>3</sub><sup>15</sup>N<sub>1</sub>]-pantothenic acid<sup>54</sup>, samples were homogenized by probe tip  
623 sonication, then acyl-CoA extraction was performed by solid phase extraction<sup>55</sup>.

624

### 625 **Negative geotaxis assay**

626 Fruit flies were collected at 5 days of age. A custom 3D printed apparatus was  
627 fabricated to perform this experiment. Two drops were used to fully send the flies  
628 to the bottom of the vials and the flies were recorded while they ascended to the  
629 top of the vials. The flies were tracked and quantified with custom software in  
630 Python 3.

631

### 632 **Hatch rate**

633 Hatch rate was measured by crossing all the fly genotypes at 15 males and 9  
634 females ratios. The flies were then separated by gender and genotype based on  
635 balancers, and percentage hatched was quantified based on the desired male  
636 genotype/phenotype for the lifespan experiments.

637

### 638 **Cell culture**

639 HeLa and SH-SY5Y CSB CRISPR-Cas9 knockouts were generated with the  
640 following plasmid: the plasmid used was modified from a pCas-Guide-EF1a-  
641 Cherry from Origene, modified to contain a guide RNA targeting the PARP  
642 binding domain of CSB, sequence: GATCGCATCGACCGACATCAGATCCG. In  
643 brief, the cells were generated by initial sorting of Cherry-positive cells by flow  
644 cytometry and single clones were isolated by serial dilution in a 96-well plate.  
645 The HeLa cells were cultured in Dulbecco's Modified Eagle Medium (DMEM),  
646 High glucose, GlutaMAX™. The SH-SY5Y cells were culture in a mixture of half  
647 Hams F12 media (Biowest # L0136) with 10% FBS and 1% pen-strep, and half

648 DMEM high glucose, GlutaMAX™ Supplement, pyruvate (Fischer #12077549).  
649 WT (GM00038) and CSB (GM01428, GM10903) fibroblast cell lines were  
650 obtained from the Coriell Institute (Camden, New Jersey, USA), and cultured in  
651 MEM (with Earle's salts, without L-glutamine, with NEAA; VWR # L0430-500)  
652 media with 15% FBS and 1% pen-strep. Unless otherwise stated, high glucose  
653 media for experiments was 25mM and low glucose media was 1mM. Low  
654 glucose media was prepared by mixing 25mM media with no glucose DMEM  
655 (Fisher #11520416) to the correct proportions.

656

### 657 **RT-PCR of 47S**

658 Cells were seeded at a density of 60,000 cells per well in 6-well plates. The cells  
659 were RNA extracted with a standard TRIzol, phenol:chloroform protocol. RT-PCR  
660 was performed with SensiFAST™ master mix. 47S was probed with the following  
661 primer sequences: 47S\_forward: CGGGTTATTGCTGACACGC and  
662 47S\_reverse: CAACCTCTCCAGCGACAGG, which were adapted from a  
663 previous study (PMID: 31841110). The GAPDH sequences used were:  
664 GAPDH\_forward: GTCAGCCGCATCTTCTTTTG and GAPDH\_reverse:  
665 GCGCCAATACGACCAAATC.

666

### 667 **UV survival**

668 CS1AN WT and CSB cells were plated at a density of 30,000 in 24-well plates  
669 and pre-treated with or without ketones and and with or without low glucose  
670 media for 24 hours. After 24 hours, the cells were UV'ed at the indicated doses.

671

### 672 **UV histone acetylation**

673 SH-SY5Y WT and CSB cells were plated at density of 3,000,000 cells per dish.  
674 24 hours later they were UV irradiated with 10J/m<sup>2</sup> and then collected at time  
675 points of 0, 3, 6, 12, and 24 hours. Cells were then acid histone extracted (PMID:  
676 17545981)

677

### 678 **Immunoprecipitation of H3**

679 Samples were added to IP buffer (150mM NaCl, 1% NP-40, 2mM EDTA, 25mM  
680 Tris pH 8.0) supplemented with protease inhibitor, phosphatase inhibitor and  
681 sodium butyrate. 10ug of H3 antibody was then added, and incubated for 1 hour  
682 on ice. Then 70uL a/g beads (Santa Cruz Biotechnology sc-2003) were added  
683 and tumbled overnight at 4C. The next day, the samples were washed 3 times  
684 with 500uL of IP buffer: they were spun down each time at 400g for 5 minutes at  
685 4C. After washing, 100uL of 1x Laemmli buffer was added to the beads.

686

### 687 **Micrococcal Nuclease**

688 The protocol to perform the micrococcal nuclease was adapted (PMID:  
689 23396441). In brief, CS1AN cells were trypsinized wash in ice cold PBS  
690 containing 5mM sodium butyrate and then centrifuged at 600g for 3 minutes. The  
691 cells were lysed in hypotonic buffer (10mM Tris–HCl pH 7.4, 10mM KCl, 15mM  
692 MgCl<sub>2</sub>, 5mM Na butyrate) on ice for 10 min. The pellet's nuclei was centrifuged at  
693 1000g for 5 minutes. The nuclei were then resuspended in Micrococcal nuclease  
694 (MNase) digestion buffer [0.32 M sucrose, 50 mM Tris–HCl (pH 7.5), 4mM  
695 MgCl<sub>2</sub>, 1 mM CaCl<sub>2</sub>, 0.1mM phenylmethylsulfonyl fluoride (PMSF), 5mM sodium  
696 butyrate]. MNase was then added and incubated at 37°C. The MNase reaction  
697 was stopped with 10mM EDTA. The pellet was then resuspended in MNase  
698 digestion buffer supplemented with 10mM EDTA and RNase and incubate at  
699 37°C for 30 minutes. STOP buffer (proteinase K, SDS, EDTA) was then added at  
700 37°C for 30 minutes. The DNA was finally extracted and purified adapted from  
701 the Thermo Fisher Ethanol DNA Purification protocol. In brief, glycogen  
702 (20ug/uL), 7.5M NH<sub>4</sub>OAc, and 100% ethanol were added to the sample in that  
703 order. The samples were then placed in -20C overnight to allowed precipitation.  
704 The next day, the sample was centrifuged at 4C for 30 minutes at 16,000g. The  
705 supernatant was then removed and combined with 150uL 70% ethanol. Next it  
706 was centrifuged at 4C for 2 minutes at 16,000g. The supernatant was again  
707 centrifuged at 4C for 30 minutes at 16,000g. The pellet was then dried and  
708 resuspended in water. The samples were then analyzed on a 1.4% agarose gel  
709 in SYBR gold.

710

### 711 **Population doubling**

712 Fibroblasts were cultured in the respective treatments: untreated, 10mM ketones,  
713 and 1mM citrate. Each week the cells were passaged, counted and replated.  
714 Population doubling (PD) was calculated with the formula:  $PD = (\text{Previous week}$   
715  $PD) + 3.332 * (\log(\text{cells in dish}) - \log(\text{cells seeded}))$ .

716

### 717 **Beta-gal measurement and quantification**

718 Cells were stained using a beta-gal kit (Sigma-Aldrich #CS0030) and were  
719 imaged using high-content microscopy (IN Cell Analyzer 2000) with a 20x  
720 objective and INCell investigator software.

721

### 722 **Antibodies and reagents**

723 Antibodies included acH3K9 (Cell signaling #9649), acH3K14 (Sigma-Aldrich  
724 #07-353), acH3K27 (Cell signaling #8173), H3 (Abcam #ab1791), PAR (Trevigen  
725 #4335-MC-100), PCAF (Cell signaling #3378), CSB (Santa Cruz Biotechnologies  
726 # sc-398022), and GAPDH (Origene #5G4-6C5). Secondary antibodies include  
727 Anti-rabbit IgG, HRP-linked antibody (Cell signaling #7074), and Anti-mouse IgG

728 (Sigma-Aldrich #A4416). Staining for colloidal blue was from Invitrogen  
729 (Invitrogen # LC6025).

730

731

### 732 **Statistical analysis**

733 All statistics were performed in R and GraphPad Prism 9.0. Two-way ANOVA  
734 was performed on the mouse categorical data.

735

### 736 **Author's Contributions**

737 M.A.P. Wrote the article, performed experiments, analyzed data, developed  
738 methodology; L.M.C.M, performed experiments; T.T. performed experiments;  
739 S.K. performed experiments; S.R. performed experiments; D.B. performed  
740 experiments; G.K. performed experiments; B.O. performed experiments; S.J.M.  
741 performed experiments; S.H. performed experiments; J.K. performed  
742 experiments; I.A. performed experiments; A.A.T. performed experiments; I.H.  
743 developed methodology and analyzed data; J.M. analyzed data; M.B.E. analyzed  
744 data; G.M. performed experiments; E.V. performed experiments; B.F. performed  
745 experiments; EvK performed experiments; N.W.S. supervised CoA experiments;  
746 H.H. supervised drosophila experiments; RdC supervised mouse experiments;  
747 M.S.K. Conceived the idea of the study, supervised experiments.

748

749

### 750 **Acknowledgements and Funding**

751 MSK supported by the Novo Nordisk Foundation Challenge Programme  
752 (#NNF17OC0027812), the Nordea Foundation (#02-2017-1749), the Neye  
753 Foundation, the Lundbeck Foundation (#R324-2019-1492), the Ministry of Higher  
754 Education and Science (#0238-00003B), VitaDAO and Insilico Medicine. NWS  
755 (R01GM132261 and R01CA259111).

756

### 757 **Conflicts of Interest**

758 All authors do not have conflict of interest to declare.

759

760

761 **References**

762

- 763 1. Nance, M. A. & Berry, S. A. Cockayne syndrome: review of 140 cases. *Am. J. Med.*  
764 *Genet.* **42**, 68–84 (1992).
- 765 2. Natale, V. A comprehensive description of the severity groups in Cockayne  
766 syndrome. *Am. J. Med. Genet. A.* **155A**, 1081–1095 (2011).
- 767 3. Koob, M. *et al.* Neuroimaging in Cockayne syndrome. *AJNR Am. J. Neuroradiol.* **31**,  
768 1623–1630 (2010).
- 769 4. Scheibye-Knudsen, M. *et al.* A High-Fat Diet and NAD<sup>+</sup> Activate Sirt1 to Rescue  
770 Premature Aging in Cockayne Syndrome. *Cell Metab.* **20**, 840–855 (2014).
- 771 5. Newman, J. C. *et al.* Ketogenic Diet Reduces Midlife Mortality and Improves  
772 Memory in Aging Mice. *Cell Metab.* **26**, 547-557.e8 (2017).
- 773 6. Roberts, M. N. *et al.* A Ketogenic Diet Extends Longevity and Healthspan in Adult  
774 Mice. *Cell Metab.* **26**, 539-546.e5 (2017).
- 775 7. Galdieri, L., Zhang, T., Rogerson, D., Lleshi, R. & Vancura, A. Protein acetylation and  
776 acetyl coenzyme a metabolism in budding yeast. *Eukaryot. Cell* **13**, 1472–1483  
777 (2014).
- 778 8. Lee, J. V. *et al.* Akt-dependent metabolic reprogramming regulates tumor cell  
779 histone acetylation. *Cell Metab.* **20**, 306–319 (2014).
- 780 9. Martínez-Reyes, I. *et al.* TCA Cycle and Mitochondrial Membrane Potential Are  
781 Necessary for Diverse Biological Functions. *Mol. Cell* **61**, 199–209 (2016).
- 782 10. McDonnell, E. *et al.* Lipids Reprogram Metabolism to Become a Major Carbon  
783 Source for Histone Acetylation. *Cell Rep.* **17**, 1463–1472 (2016).

- 784 11. S, H. *et al.* Integrated -omics approach reveals persistent DNA damage  
785 rewires lipid metabolism and histone hyperacetylation via MYS-1/Tip60. *Sci. Adv.*  
786 **8**, (2022).
- 787 12. Peleg, S., Feller, C., Ladurner, A. G. & Imhof, A. The Metabolic Impact on  
788 Histone Acetylation and Transcription in Ageing. *Trends Biochem. Sci.* **41**, 700–  
789 711 (2016).
- 790 13. Bannister, A. J. & Kouzarides, T. Regulation of chromatin by histone  
791 modifications. *Cell Res.* **21**, 381–395 (2011).
- 792 14. Rogina, B., Reenan, R. A., Nilsen, S. P. & Helfand, S. L. Extended life-span  
793 conferred by cotransporter gene mutations in *Drosophila*. *Science* **290**, 2137–  
794 2140 (2000).
- 795 15. Schwarz, F. *et al.* Knockdown of Indy/CeNac2 extends *Caenorhabditis elegans*  
796 life span by inducing AMPK/aak-2. *Aging* **7**, 553–567 (2015).
- 797 16. Birkenfeld, A. L. *et al.* Deletion of the Mammalian INDY Homolog Mimics  
798 Aspects of Dietary Restriction and Protects against Adiposity and Insulin  
799 Resistance in Mice. *Cell Metab.* **14**, 184–195 (2011).
- 800 17. Hardies, K. *et al.* Recessive mutations in SLC13A5 result in a loss of citrate  
801 transport and cause neonatal epilepsy, developmental delay and teeth hypoplasia.  
802 *Brain J. Neurol.* **138**, 3238–3250 (2015).
- 803 18. Schossig, A. *et al.* SLC13A5 is the second gene associated with Kohlschütter-  
804 Tönz syndrome. *J. Med. Genet.* **54**, 54–62 (2017).

- 805 19. Wilson, B. T. *et al.* The Cockayne Syndrome Natural History (CoSyNH) study:  
806 clinical findings in 102 individuals and recommendations for care. *Genet. Med. Off.*  
807 *J. Am. Coll. Med. Genet.* **18**, 483–493 (2016).
- 808 20. Gargano, J. W., Martin, I., Bhandari, P. & Grotewiel, M. S. Rapid iterative  
809 negative geotaxis (RING): a new method for assessing age-related locomotor  
810 decline in *Drosophila*. *Exp. Gerontol.* **40**, 386–395 (2005).
- 811 21. Rogina, B., Reenan, R. A., Nilsen, S. P. & Helfand, S. L. Extended Life-Span  
812 Conferred by Cotransporter Gene Mutations in *Drosophila*. *Science* **290**, 2137–  
813 2140 (2000).
- 814 22. Susa, D. *et al.* Congenital DNA repair deficiency results in protection against  
815 renal ischemia reperfusion injury in mice. *Aging Cell* **8**, 192–200 (2009).
- 816 23. Weidenheim, K. M., Dickson, D. W. & Rapin, I. Neuropathology of Cockayne  
817 syndrome: Evidence for impaired development, premature aging, and  
818 neurodegeneration. *Mech. Ageing Dev.* **130**, 619–636 (2009).
- 819 24. Scheibye-Knudsen, M. *et al.* Cockayne syndrome group B protein prevents the  
820 accumulation of damaged mitochondria by promoting mitochondrial autophagy. *J.*  
821 *Exp. Med.* **209**, 855–869 (2012).
- 822 25. Cockayne, E. A. Dwarfism with retinal atrophy and deafness. *Arch. Dis. Child.*  
823 **11**, 1–8 (1936).
- 824 26. Cockayne, E. A. Dwarfism with retinal atrophy and deafness. *Arch. Dis. Child.*  
825 **21**, 52–54 (1946).



- 826 27. Bair, W.-N. *et al.* Of aging mice and men: gait speed decline is a translatable  
827 trait, with species-specific underlying properties. *J. Gerontol. A. Biol. Sci. Med. Sci.*  
828 (2019) doi:10.1093/gerona/glz015.
- 829 28. Sasaki, K. *et al.* Demyelinating peripheral neuropathy in Cockayne syndrome:  
830 a histopathologic and morphometric study. *Brain Dev.* **14**, 114–117 (1992).
- 831 29. Scheibye-Knudsen, M. *et al.* Cockayne syndrome group A and B proteins  
832 converge on transcription-linked resolution of non-B DNA. *Proc. Natl. Acad. Sci.*  
833 **113**, 12502–12507 (2016).
- 834 30. Yu, A., Fan, H. Y., Liao, D., Bailey, A. D. & Weiner, A. M. Activation of p53 or loss  
835 of the Cockayne syndrome group B repair protein causes metaphase fragility of  
836 human U1, U2, and 5S genes. *Mol. Cell* **5**, 801–810 (2000).
- 837 31. Carrozzo, R. *et al.* SUCLA2 mutations are associated with mild methylmalonic  
838 aciduria, Leigh-like encephalomyopathy, dystonia and deafness. *Brain J. Neurol.*  
839 **130**, 862–874 (2007).
- 840 32. Elpeleg, O. *et al.* Deficiency of the ADP-forming succinyl-CoA synthase activity  
841 is associated with encephalomyopathy and mitochondrial DNA depletion. *Am. J.*  
842 *Hum. Genet.* **76**, 1081–1086 (2005).
- 843 33. Heckenbach, I. *et al.* Deep Learning Shows Cellular Senescence Is a Barrier to  
844 Cancer Development. *bioRxiv* 2021.03.18.435987 (2021)  
845 doi:10.1101/2021.03.18.435987.
- 846 34. Cheng, C.-W. *et al.* Ketone Body Signaling Mediates Intestinal Stem Cell  
847 Homeostasis and Adaptation to Diet. *Cell* **178**, 1115–1131.e15 (2019).

- 848 35. Shimazu, T. *et al.* Suppression of Oxidative Stress by  $\beta$ -Hydroxybutyrate, an  
849 Endogenous Histone Deacetylase Inhibitor. *Science* **339**, 211–214 (2013).
- 850 36. Houston, R. *et al.* Acetylation-mediated remodeling of the nucleolus regulates  
851 cellular acetyl-CoA responses. *PLoS Biol.* **18**, e3000981 (2020).
- 852 37. Rajarajacholan, U. K., Thalappilly, S. & Riabowol, K. ING1 regulates rRNA  
853 levels by altering nucleolar chromatin structure and mTOR localization. *Nucleic  
854 Acids Res.* **45**, 1776–1792 (2017).
- 855 38. Zhao, M. *et al.* PCAF/GCN5-Mediated Acetylation of RPA1 Promotes  
856 Nucleotide Excision Repair. *Cell Rep.* **20**, 1997–2009 (2017).
- 857 39. Stauffer, D., Chang, B., Huang, J., Dunn, A. & Thayer, M. p300/CREB-binding  
858 Protein Interacts with ATR and Is Required for the DNA Replication Checkpoint \*.  
859 *J. Biol. Chem.* **282**, 9678–9687 (2007).
- 860 40. Scheibye-Knudsen, M., Scheibye-Alsing, K., Canugovi, C., Croteau, D. L. & Bohr,  
861 V. A. A novel diagnostic tool reveals mitochondrial pathology in human diseases  
862 and aging. *Aging* **5**, 192–208 (2013).
- 863 41. Sekelsky, J. DNA Repair in Drosophila: Mutagens, Models, and Missing Genes.  
864 *Genetics* **205**, 471–490 (2017).
- 865 42. Deger, N., Yang, Y., Lindsey-Boltz, L. A., Sancar, A. & Selby, C. P. Drosophila,  
866 which Lacks Canonical Transcription-Coupled Repair Proteins, Performs  
867 Transcription-Coupled Repair. *J. Biol. Chem.* jbc.AC119.011448 (2019)  
868 doi:10.1074/jbc.AC119.011448.
- 869 43. Deger, N. *et al.* CSB-independent, XPC-dependent transcription-coupled  
870 repair in Drosophila. *Proc. Natl. Acad. Sci. U. S. A.* **119**, e2123163119 (2022).

- 871 44. Guilgur, L. G. *et al.* Requirement for highly efficient pre-mRNA splicing during  
872 *Drosophila* early embryonic development. *eLife* **3**, e02181 (2014).
- 873 45. Yagi, Y. & Ip, Y. T. Helicase89B is a Mot1p/BTAF1 homologue that mediates  
874 an antimicrobial response in *Drosophila*. *EMBO Rep.* **6**, 1088–1094 (2005).
- 875 46. Keijzers, G., Bakula, D. & Scheibye-Knudsen, M. Monogenic Diseases of DNA  
876 Repair. *N. Engl. J. Med.* **377**, 1868–1876 (2017).
- 877 47. Langmead, B. & Salzberg, S. L. Fast gapped-read alignment with Bowtie 2.  
878 *Nat. Methods* **9**, 357–359 (2012).
- 879 48. Patro, R., Duggal, G., Love, M. I., Irizarry, R. A. & Kingsford, C. Salmon provides  
880 fast and bias-aware quantification of transcript expression. *Nat. Methods* **14**, 417–  
881 419 (2017).
- 882 49. Love, M. I. *et al.* Tximeta: Reference sequence checksums for provenance  
883 identification in RNA-seq. *PLoS Comput. Biol.* **16**, e1007664 (2020).
- 884 50. Ashburner, M. *et al.* Gene ontology: tool for the unification of biology. The  
885 Gene Ontology Consortium. *Nat. Genet.* **25**, 25–29 (2000).
- 886 51. The Gene Ontology Consortium. The Gene Ontology Resource: 20 years and  
887 still GOing strong. *Nucleic Acids Res.* **47**, D330–D338 (2019).
- 888 52. Cer, R. Z. *et al.* Non-B DB v2.0: a database of predicted non-B DNA-forming  
889 motifs and its associated tools. *Nucleic Acids Res.* **41**, D94–D100 (2013).
- 890 53. Frey, A. J. *et al.* LC-quadrupole/Orbitrap high-resolution mass spectrometry  
891 enables stable isotope-resolved simultaneous quantification and <sup>13</sup>C-isotopic  
892 labeling of acyl-coenzyme A thioesters. *Anal. Bioanal. Chem.* **408**, 3651–3658  
893 (2016).

- 894 54. Snyder, N. W. *et al.* Production of stable isotope-labeled acyl-coenzyme A  
895 thioesters by yeast stable isotope labeling by essential nutrients in cell culture.  
896 *Anal. Biochem.* **474**, 59–65 (2015).
- 897 55. Trefely, S., Doan, M. T. & Snyder, N. W. Crosstalk between cellular metabolism  
898 and histone acetylation. *Methods Enzymol.* **626**, 1–21 (2019).
- 899  
900

901 **Figure Legends**

902

903 **Figure 1. Hel89B is a *Drosophila melanogaster* homologue of CSB. A**  
904 Hierarchical clustering of *Drosophila* SWI/SNF genes with human ERCC6 based  
905 on the sequence. **B** Hatch rate of Hel89B1 and mGFP flies (n = 6, 25-30 flies per  
906 replica). **C** Survival of standard or 10mM ketone fed larvae after exposure to  
907 different doses of UV-C light. **D** AUC of UV survival graphs in C. **E**  
908 Representative images of resumption of RNA synthesis after UV induced  
909 damage. **F** Quantification of EU staining from E (300-900 cells per replicate. n  
910 = 3). **G** AUC of F. **H** Negative geotaxis flowerplot of mGFP and Hel89B1 flies. **I**  
911 Speed from the negative geotaxis assay. **J** % of flies that cross 5cm line after 5  
912 seconds from negative geotaxis assay. **K** Lifespan of flies treated with various  
913 doses of the ketone betahydroxybutyrate. **L** Max distance traveled per day of  
914 mGFP flies in K. **M** Max distance traveled per day of Hel89B flies in K. **N** Acetyl-  
915 CoA measurements of flies. **O** AUC of acetyl-CoA measurements from N.

916

917 **Figure 2. High-throughput phenotyping show ketones rescue motor**  
918 **function in normal and premature aging. A** Analysis pipeline of experiments. **B**  
919 Heatmap of mean lifespan (n=3, 5644 flies). **C** Heatmap of max lifespan (n=3,  
920 5644 flies). **D** Lifetime motor function: AUC of distance traveled until mean  
921 lifespan (n=3, 5644 flies). **E** Change in the max distance traveled as a function of  
922 age (n=3, 5644 flies). **F** Starting distance traveled (n=3, 5644 flies). **G** Change in  
923 the max speed traveled as a function of age (n=3, 5644 flies).

924

925 **Figure 3. A ketogenic diet rescues features of exacerbated aging in *Csb<sup>m/m</sup> /***  
926 ***mIndy<sup>-/-</sup>* mice. A** Body weight of 6 month old (start) WT, *mIndy<sup>-/-</sup>*, *Csb<sup>m/m</sup>* and  
927 *Csb<sup>m/m</sup> / Indy<sup>-/-</sup>* double knockouts (DKO). **B** Food consumption. **C** Body  
928 temperature. **D** Feeding efficiency. **E** Lean-to-fat ratio. **F** Percentage lean mass.  
929 **G** Fat percentage. **H**  $VO_2$  of the mice in metabolic cages. **I** RER of the mice in  
930 metabolic cages. **J**  $VO_2$  of the mice in metabolic treadmills. **K** RER of the mice  
931 in metabolic treadmills. **L** Oral Glucose Tolerance Test (OGTT). **M** AUC of  
932 OGTT. **N** Insulin Tolerance Test (ITT). **O** AUC of ITT. **P** Representative  
933 micrographs of Haematoxylin and eosin (H&E) staining of liver tissues and luxol  
934 fast blue staining of cerebellum. **Q** Startle chamber analysis. Maximum voltage  
935 (Vmax) measured from the piezoelectric sensor at each decibel (dB) sound. **R**  
936 AUC of Q. n=12 per group, male C57BL/6J. Data presented with standard error  
937 of means (SEM).

938

939

940 **Figure 4. A ketogenic diet attenuates transcriptional and metabolic**  
941 **consequences of premature aging. A** Top-5 altered Gene ontology (GO)  
942 terms from each genotype in RNA-sequencing of the cerebellum (n=6 per group).  
943 Red: up Blue: down (see supplementary data for the complete list of GO terms).  
944 **B** Principal component analysis of ~6000 metabolites in the cerebellum (n=6 per  
945 group). **C-I** Pathway topology analysis of the metabolomics experiments. All  
946 groups are compared to WTSD. **J** Acyl-CoA species heatmaps of liver,

947 cerebellum (**K**) and quadriceps (**L**) (Z-score normalized within each metabolite,  
948 n=6).

949

950

951 **Figure 5. Ketones reduce transcriptional stalling at G4 structures. A** UV-C  
952 survival of WT and CSB deficient cells (CS1AN), with low and high glucose, with  
953 and without ketones (n=3, SEM). **B** Senescence prediction of WT and CSB  
954 fibroblasts, at low (WT: p6, CSB: p4), medium (WT: p13, CSB: p13) and high  
955 passages (WT: p28, CSB: p25). **C** Western blot of histone acetylation levels in  
956 SH-SY5Y cells after exposure UV-C (10J/m<sup>2</sup>) **D** Western blot of H3 IP of acid  
957 extracted histones treated with mock (DMSO) and 1uM Olaparib (n=3, SEM). **E**  
958 47s transcription in patient fibroblasts of WT (GM00038) and CSB (GM01428)  
959 (n=4, SEM). **F** HeLa cell survival (left) in low glucose (1mM) treated with either  
960 Pyridostatin, Pyridostatin + 1uM CX5461, or Pyridostatin + 10mM ketones; AUC  
961 of survival experiment (right) (n=5, SEM). **G** Micrococcal nuclease experiment of  
962 WT and CSB CS1AN cells, with and without UV (n=5, SEM). **H-J** Normalized  
963 coverage around all predicted G4 structures of *Indy*<sup>-/-</sup>, *Csb*<sup>m/m</sup>, and DKO mice  
964 (n=6 per group). **K** Normalized coverage around all G4 structures in cells  
965 subjected to indicated knockdowns (mined from GSE168861). **L** ChIP-seq  
966 analysis of ac-H3K27 pulldown at G4 structures (mined from GSE134044). **M**  
967 ChIP-seq analysis of PCAF pulldown at G4 structures (GSE93975). **N**  
968 Normalized coverage around all G4 structures in cells treated with JQ1  
969 (GSE56267). **O** Hierarchical cluster of disease related to various cellular  
970 processes.

971

972

973 **Supplementary Figures**  
974  
975 **Supplementary Figure 1. Drosophila phenotyping.** **A** Hatch rate of the  
976 genotypes used. **B** Schematic of UV-survival assay. **C** Hel89B gene expression  
977 of UAS-mGFP (control), Hel89B RNAi #1, and Hel89B RNAi #2 third-instar  
978 larvae. **D** Hel89B gene expression of siSCR (control), siHel89B #1, siHel89B  
979 #2a, and siHel89B #2b in drosophila S2 cells. **E** Acyl-CoA species of Hel89B and  
980 mGFP flies at various ages.  
981  
982 **Supplementary Figure 2. Lifespan curves of genotypes.** Lifespan curves of all  
983 groups depicted in one graph, n = 3 sets, 5644 flies.  
984  
985 **Supplementary Figure 3. Additional mouse data.** **A** Schematic illustration of  
986 the mouse experimental procedure. Six-month WT, mIndy<sup>-/-</sup>, Csb<sup>m/m</sup>, and DKO  
987 mice were fed either a standard or ketogenic diet for six months (12 per group),  
988 and assessed at three time points (beginning, middle and end) for behavior and  
989 metabolic readouts. At the last time point, the mice were sacrificed, tissues  
990 harvested and saved for post-mortem analysis. **B** Weights of organs. **C**  
991 Haematology analysis. **D** Open field assessment for 30 minute periods. **E** Y-  
992 maze for 10 minute periods. Spontaneous alteration tests. **F** Elevated zero maze  
993 for 5 minute periods. **G** Gait analysis using the TSE MotoRater. n=12 per group,  
994 SEM.  
995  
996 **Supplementary Figure 4. Omics data from the murine experiments.** **A**  
997 Principal component analyses of gene expression in the cerebellum by RNA seq  
998 (n=6 per group). **B** Venn diagram of altered GO terms from the RNA seq  
999 experiment. **C** Hierarchical clustering of z-score normalized metabolites in the  
1000 cerebellum. **D** Top 50 and bottom 50 metabolites in heatmap.  
1001  
1002 **Supplementary Figure 5. Altered metabolic pathways in the cerebellum of**  
1003 **mice.** n= 6 per group. All data was log-normalized and the groups are compared  
1004 to the WTSD mice.  
1005  
1006 **Supplementary Figure 6. Data from csb deficient cell lines.** **A** Population  
1007 doubling of human fibroblasts: GM00038 (WT, control), GM01428 (Cockayne  
1008 syndrome), and GM10903 (De Sanctis-Cacchione syndrome). **B** Western blot  
1009 confirming CSB deletion in both HeLa and SH-SY5Y cells (top), as well as UV-  
1010 dose response curves (bottom). **C** Morphometric data from the senescence  
1011 prediction analysis of WT and CSB fibroblasts.  
1012  
1013 **Supplementary Figure 7. Multiple DNA structures elicit transcriptional**  
1014 **stalling in prematurely aged mice.** Coverage surrounding Non-B DNA  
1015 structures of WT, Csb<sup>m/m</sup>, mIndy<sup>-/-</sup>, and DKO mice from RNA-seq. STR: Short  
1016 tandem repeat, IR: inversed repeat, APR: A-phased repeat, MR: Mirror repeat,  
1017 DR: Direct repeat.  
1018

1019 **Supplementary Figure 8. Putative model of how ketones might facilitate**  
1020 **transcriptional readthrough of secondary DNA structures.**



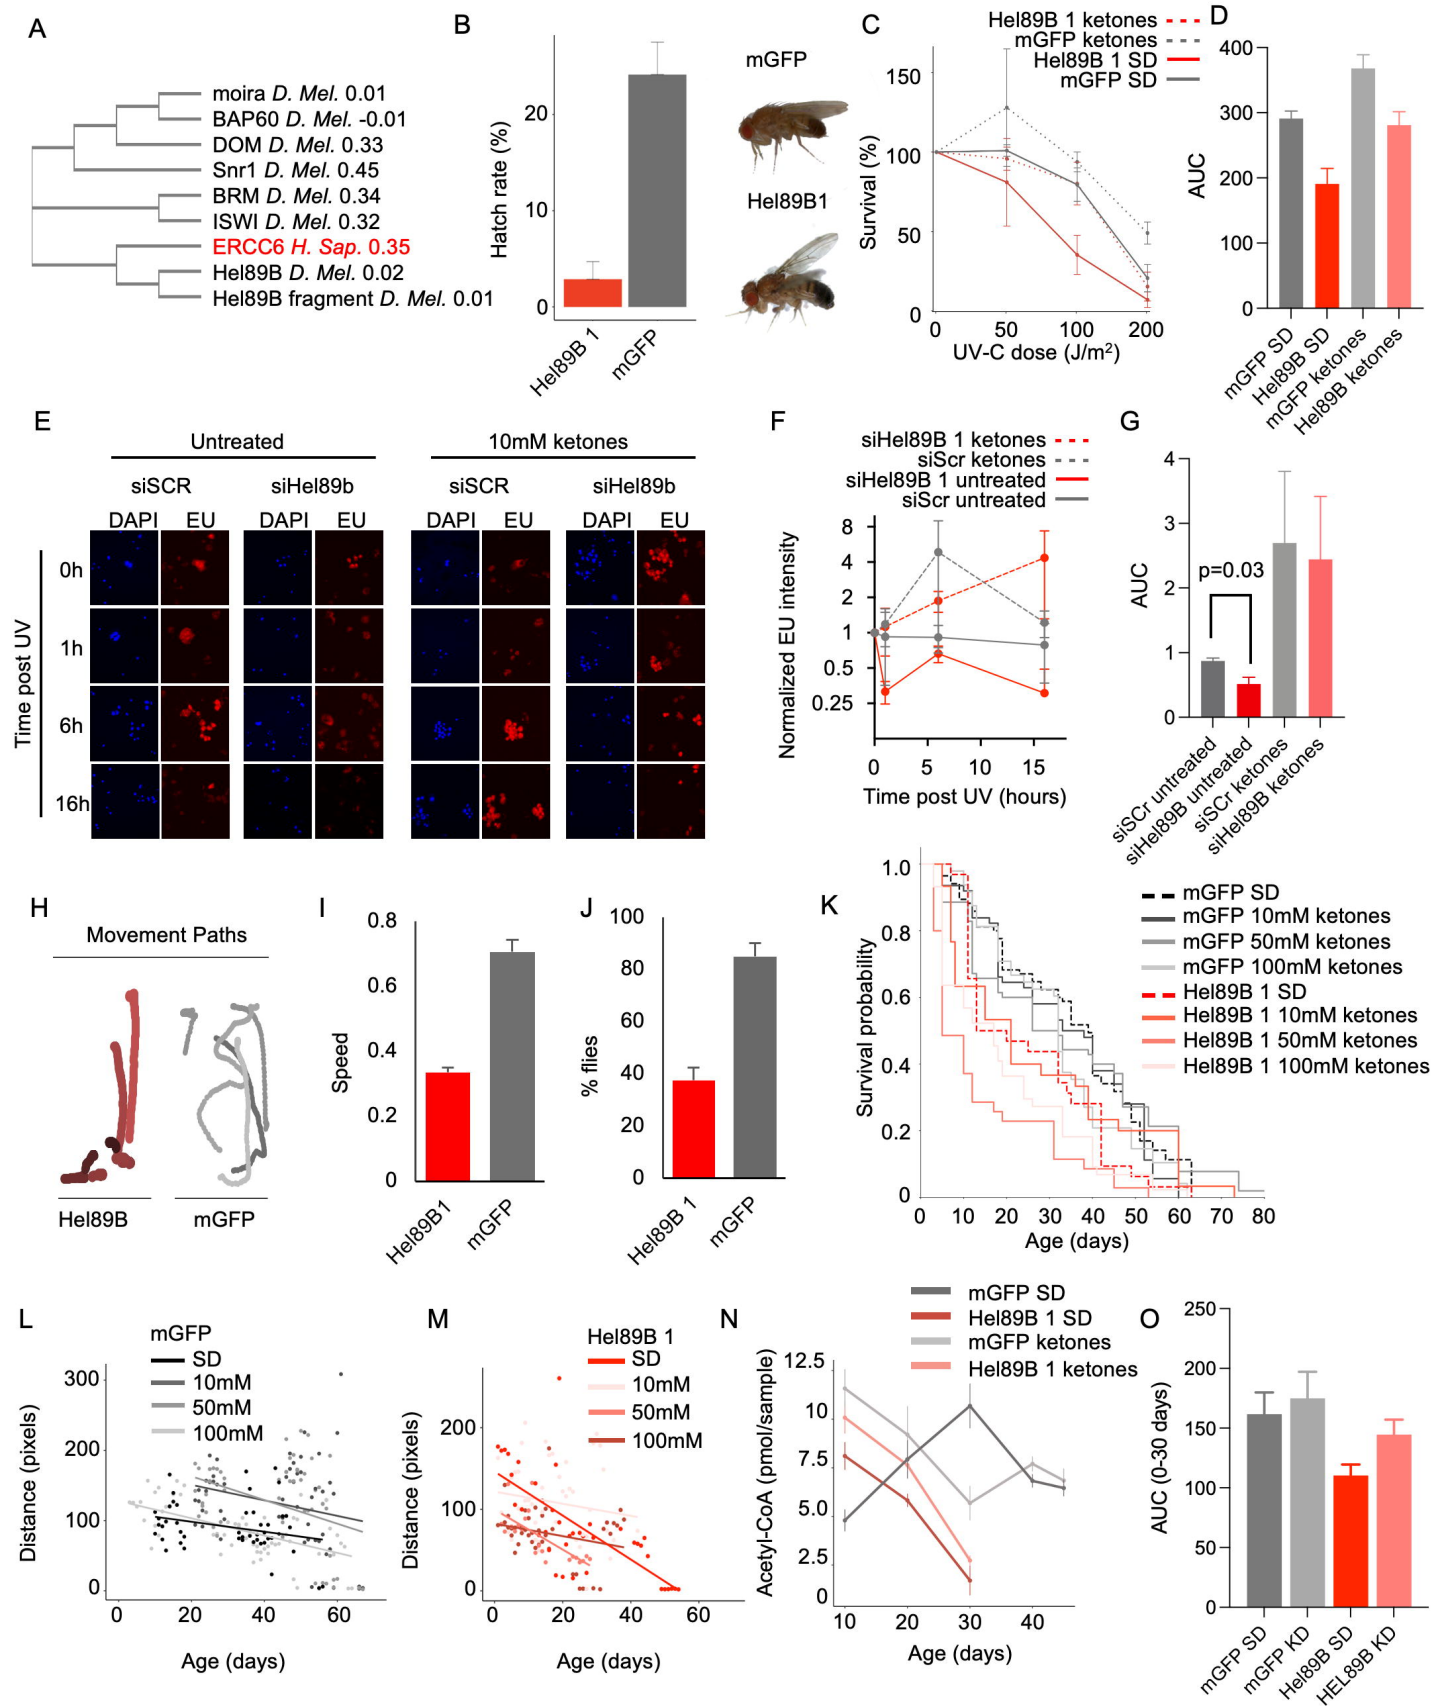

Figure 1

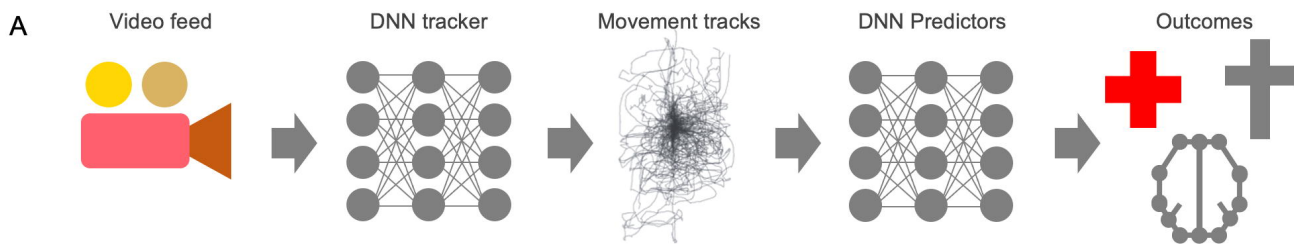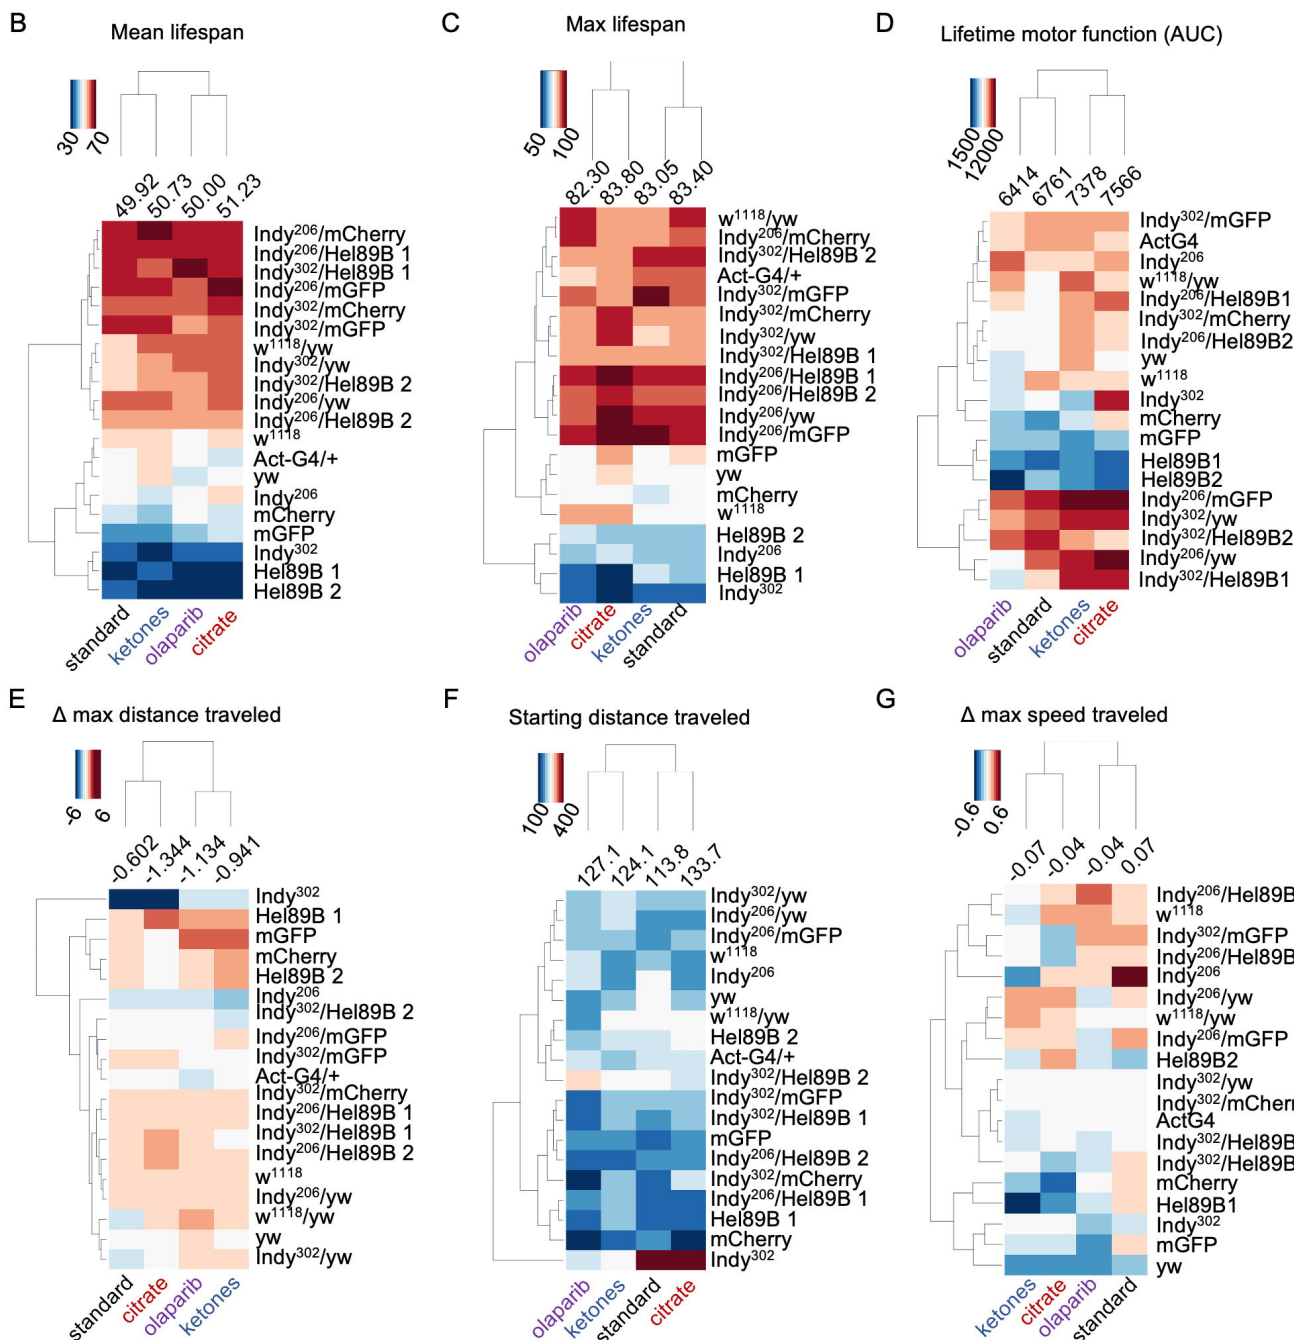

Figure 2

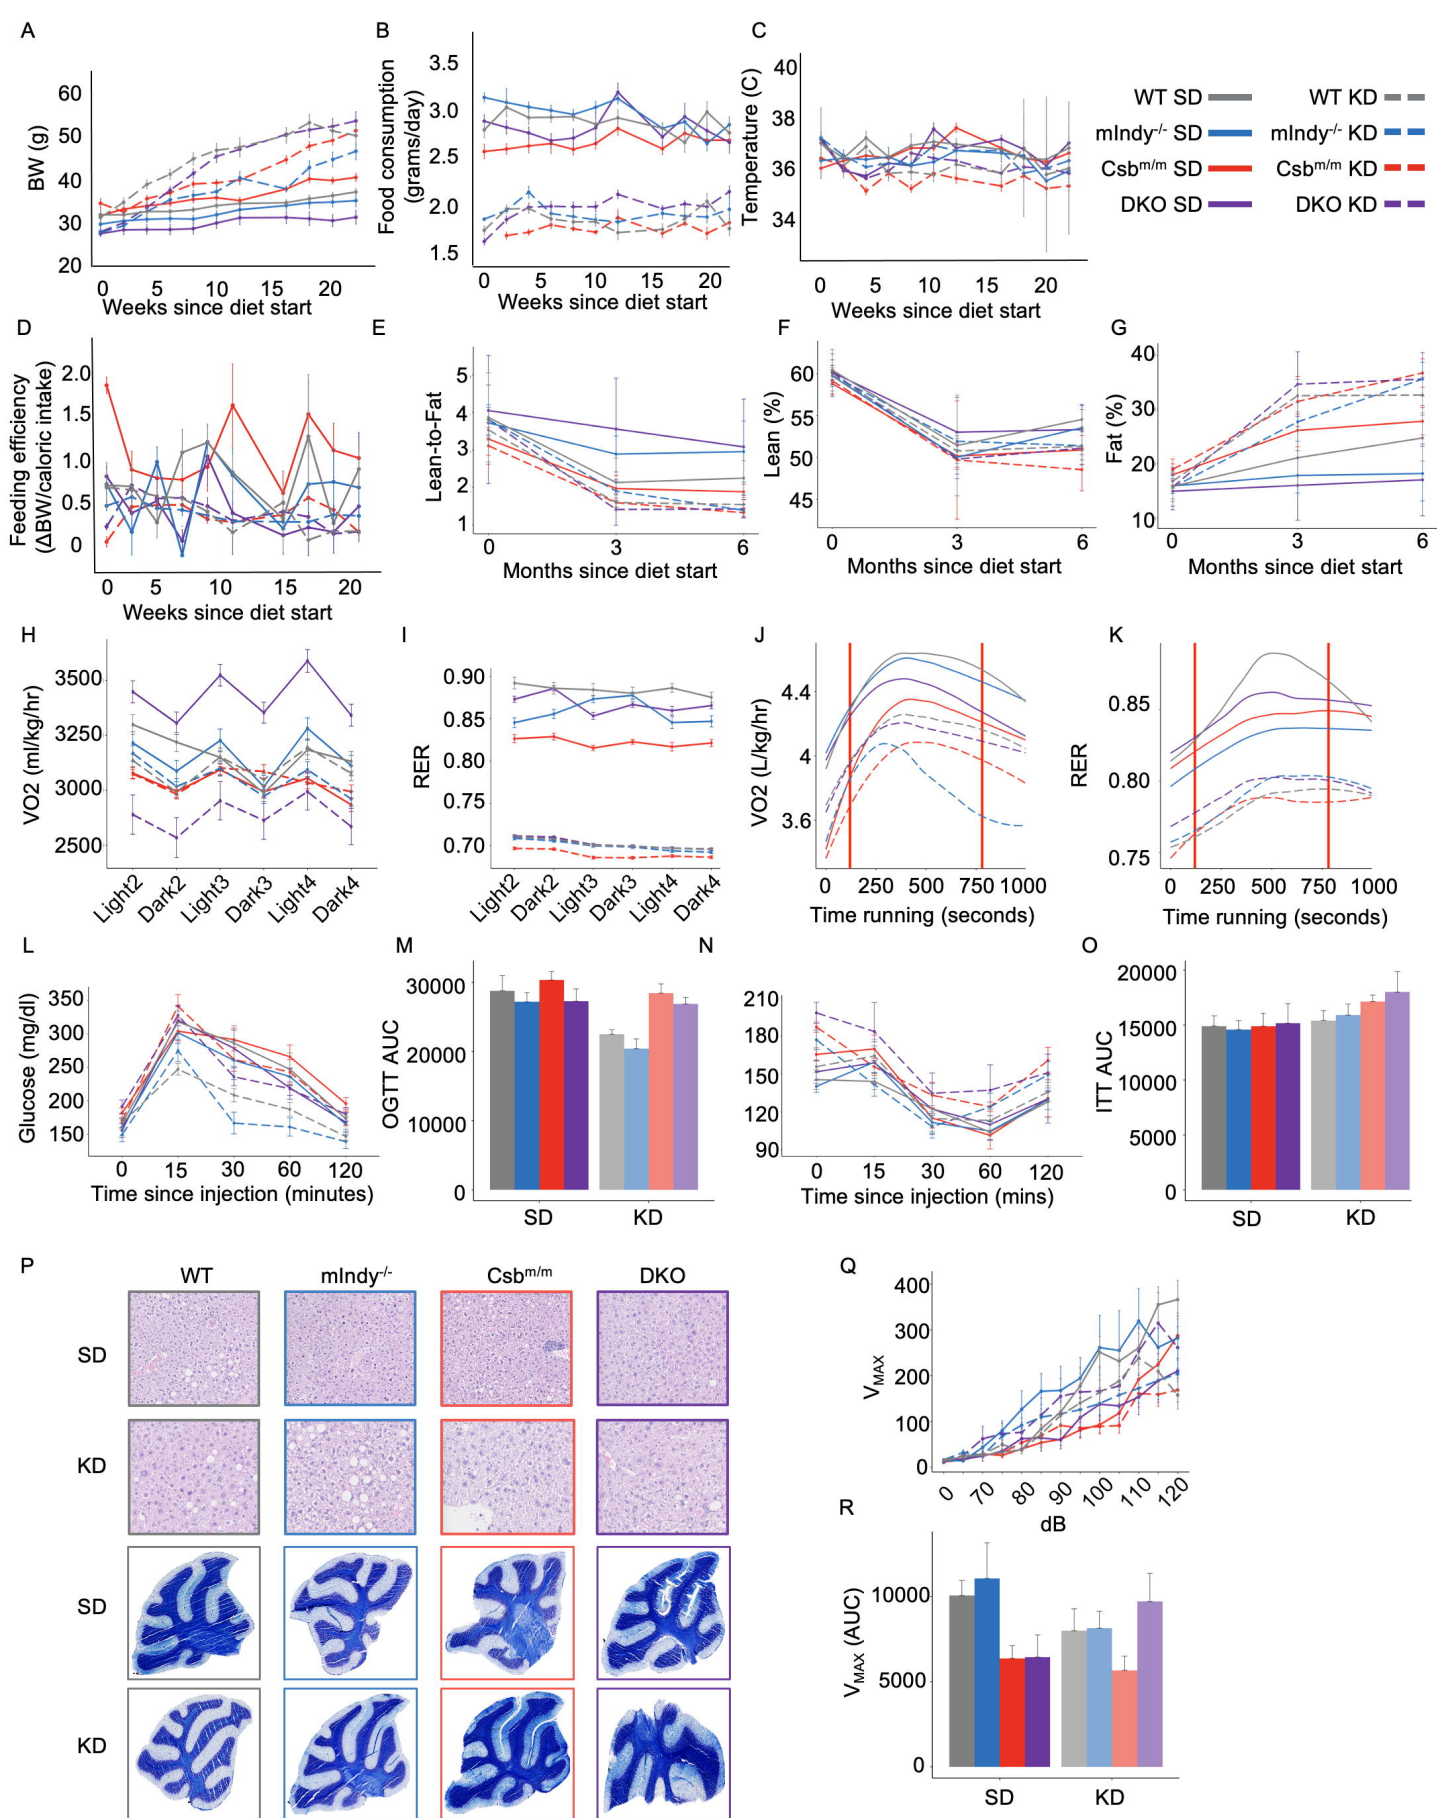

Figure 3

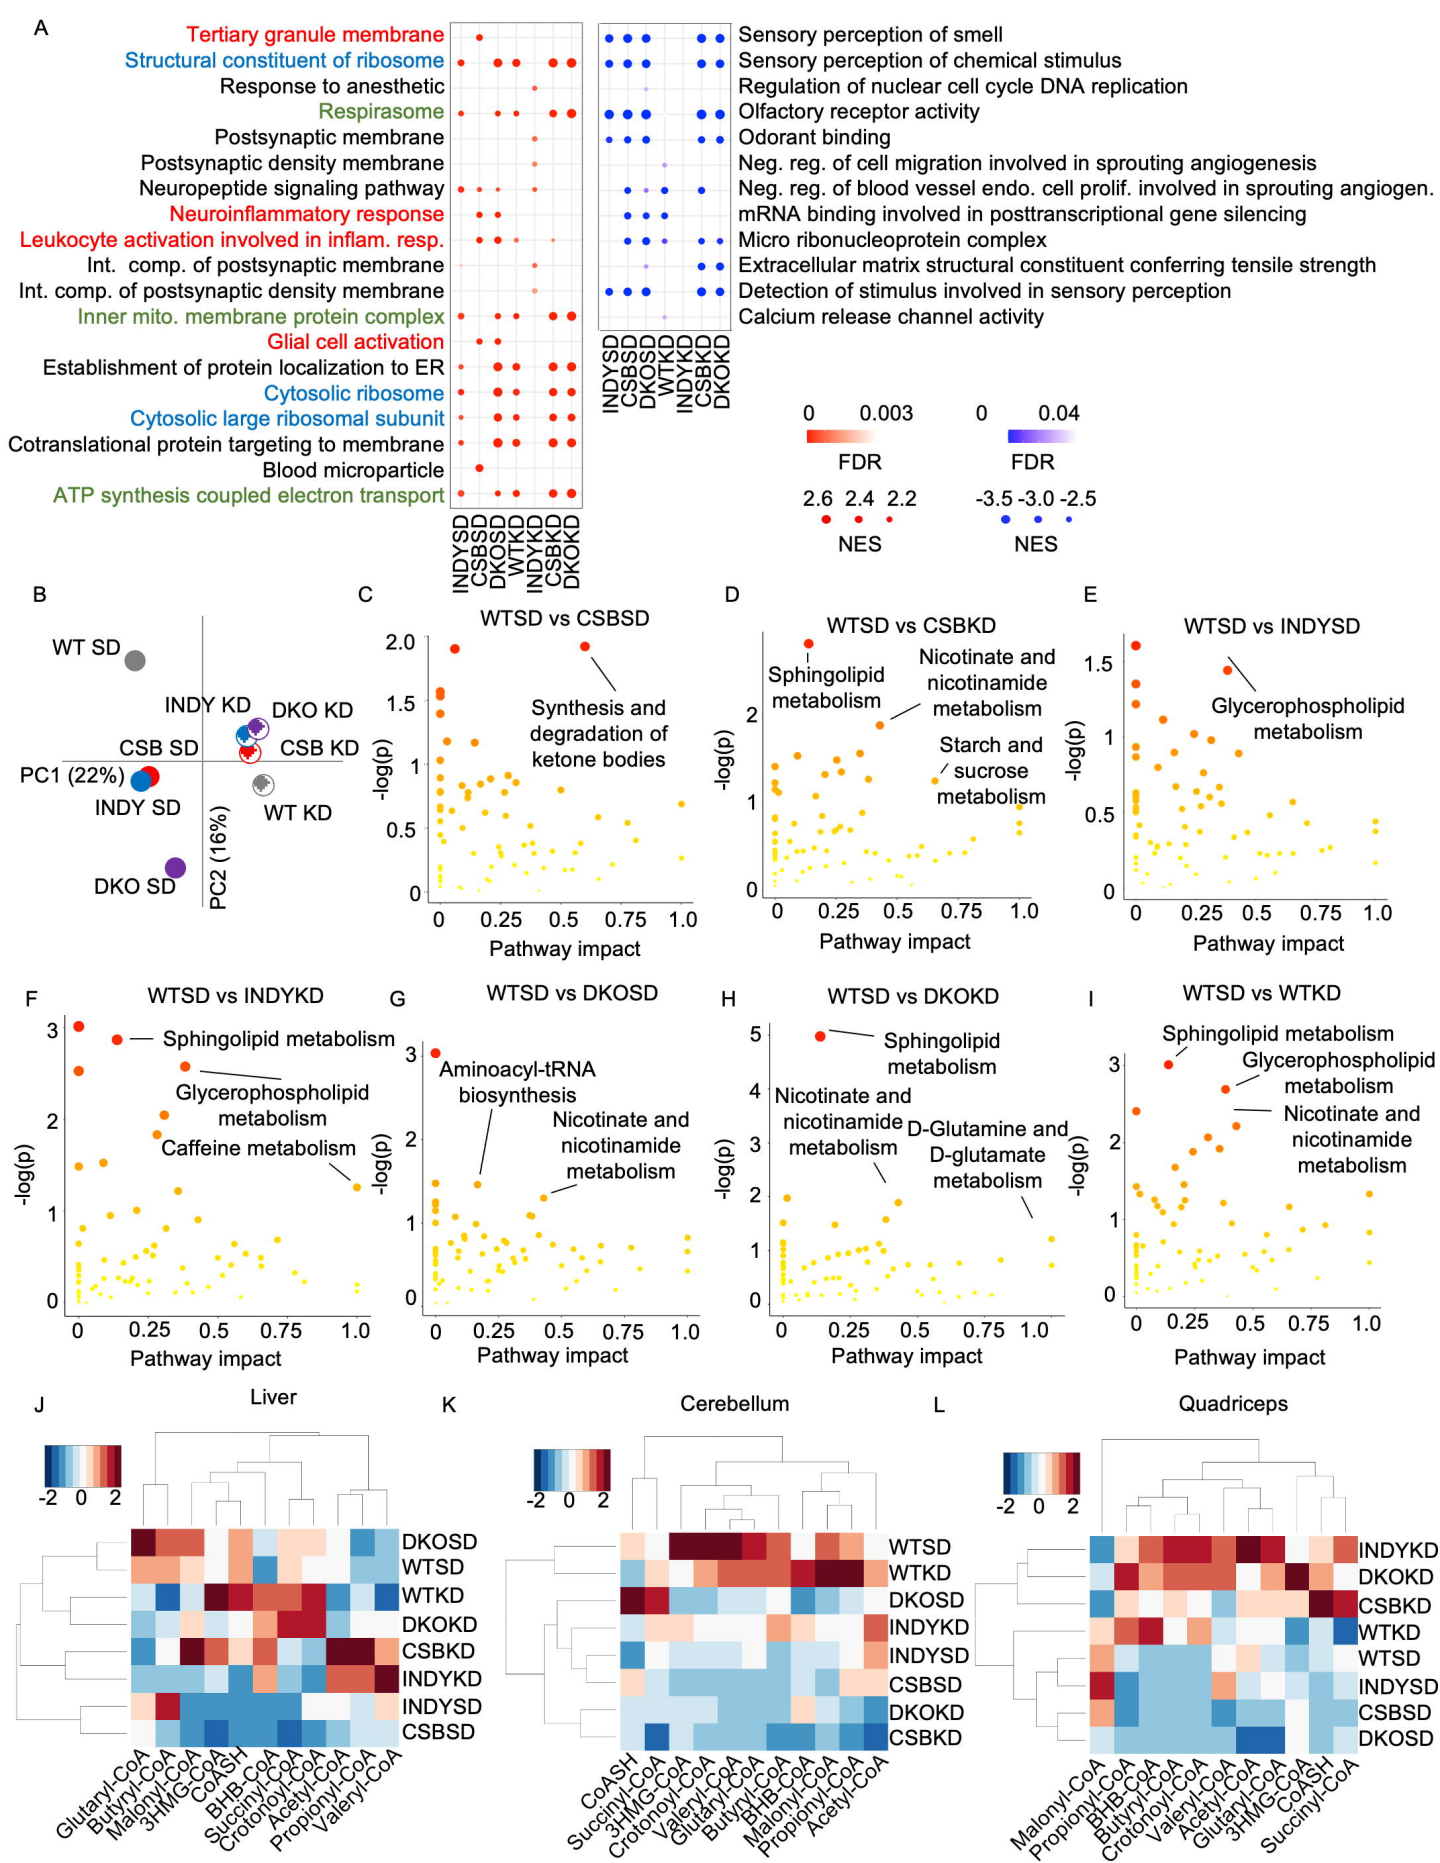

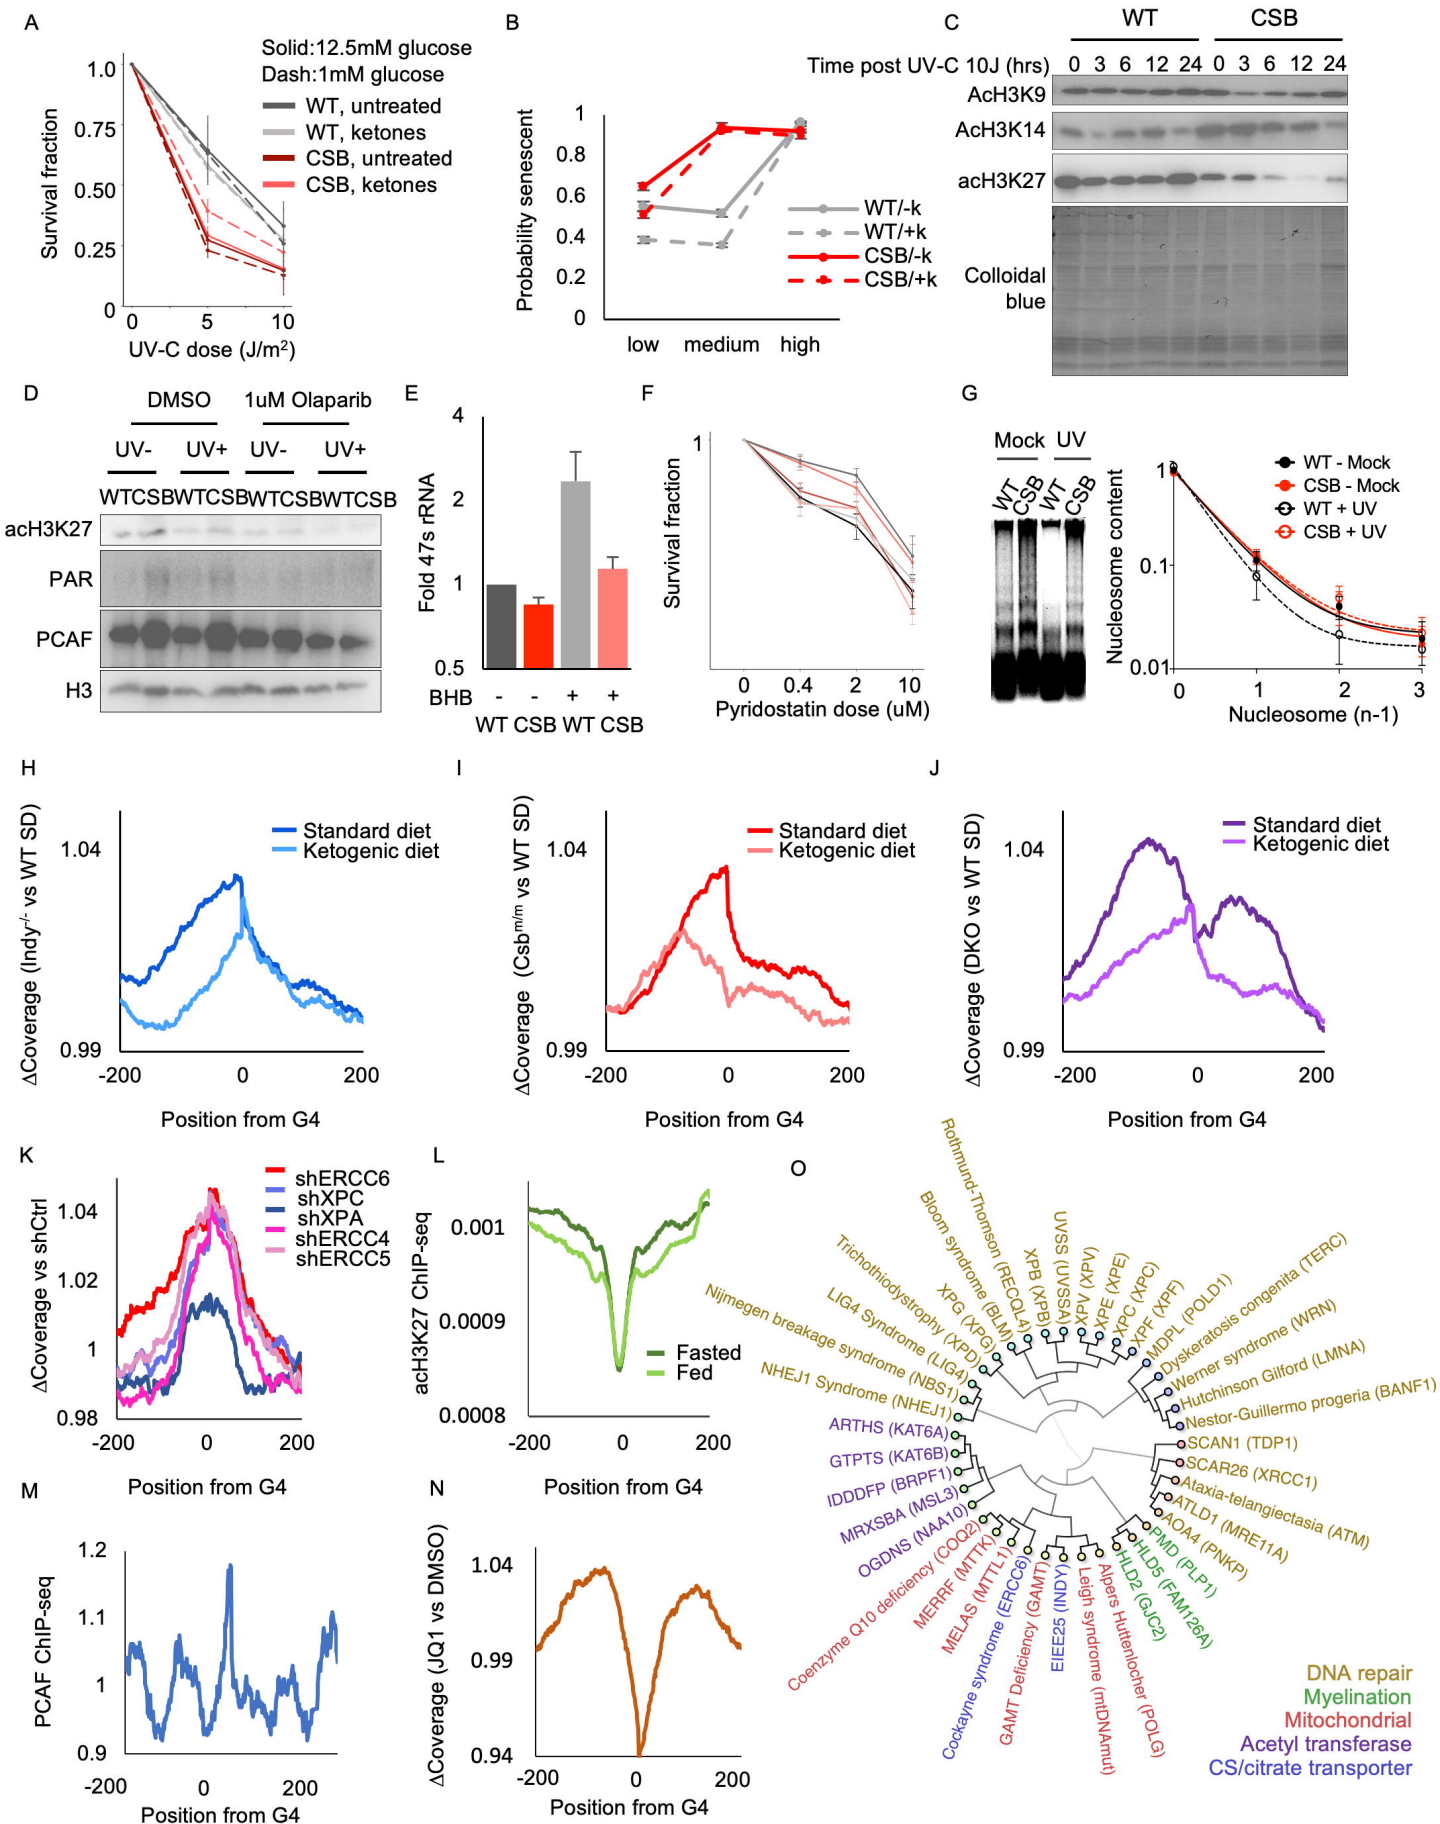

Figure 5
